1 **Coupled small molecules target RNA interference and JAK/STAT signaling to reduce**  
2 **Zika virus infection in *Aedes aegypti***

3  
4 Chasity E. Trammell<sup>1</sup>, Gabriela Ramirez<sup>2</sup>, Irma Sanchez-Vargas<sup>2</sup>, Shirley Luckhart<sup>3,4</sup>,  
5 Rushika Perera<sup>2\*</sup>, and Alan G. Goodman<sup>1,5,6\*</sup>

6  
7 1: School of Molecular Biosciences, College of Veterinary Medicine, Washington State  
8 University, Pullman, WA 99164, USA.

9  
10 2: Center for Vector-borne Infectious Diseases, Department of Microbiology, Immunology  
11 and Pathology, Colorado State University, Fort Collins, CO 80523, USA.

12  
13 3: Department of Entomology, Plant Pathology, and Nematology, College of Agricultural and  
14 Life Sciences, University of Idaho, Moscow, ID 83844, USA.

15  
16 4: Department of Biological Sciences, College of Science, University of Idaho, Moscow, ID  
17 83844, USA

18  
19 5: Paul G. Allen School for Global Health, College of Veterinary Medicine, Washington State  
20 University, Pullman, WA 99164, USA

21  
22 6: Lead contact

23  
24 \* Correspondence: [rushika.perera@colostate.edu](mailto:rushika.perera@colostate.edu) (R.P.); [alan.goodman@wsu.edu](mailto:alan.goodman@wsu.edu) (A.G.G.)

25  
26 Keywords: RNAi, ZIKV, insulin signaling, mosquito, DMAQ-B1, AKT inhibitor VIII

27

28 **ABSTRACT**

29 The recent global Zika epidemics have revealed the significant threat that mosquito-borne  
30 viruses pose. There are currently no effective vaccines or prophylactics to prevent Zika  
31 virus (ZIKV) infection. Limiting exposure to infected mosquitoes is best way to reduce  
32 disease incidence. Recent studies have focused on targeting mosquito reproduction and  
33 immune responses to reduce transmission. In particular, previous work evaluated the  
34 effect of insulin signaling on antiviral JAK/STAT and RNAi in vector mosquitoes. In this  
35 work, we demonstrate that targeting insulin signaling through the repurposing of small  
36 molecule drugs results in the activation of both of these antiviral pathways. Activation of  
37 this coordinated response additively reduced ZIKV levels in *Aedes aegypti* mosquitoes. This  
38 effect included a quantitatively greater reduction in salivary gland ZIKV levels relative to  
39 single pathway activation, indicating the potential for field delivery of these small  
40 molecules to substantially reduce virus transmission.

41

## 42 INTRODUCTION

43 Mosquito-borne viruses pose a significant global health threat and this threat is  
44 increased by dynamic ecological and human factors. Global warming and urbanization have  
45 permitted mosquitoes and arboviruses to spread into previously virus-free regions (Alaniz  
46 et al., 2018; Samy et al., 2016). This occurred during the 2015-17 Zika virus (ZIKV) Western  
47 hemisphere epidemic that originated in South America and spread into North America,  
48 resulting in 538,451 suspected cases, 223,477 confirmed cases, and 3,720 congenital  
49 syndrome cases (Pan American Health Organization, 2015, 2016). Subsequent outbreaks  
50 have followed that establishes ZIKV as an active pathogen of concern that requires  
51 intervention (Bhargavi and Moa, 2020). Current efforts have focused on strategies to  
52 reduce virus transmission to and from the mosquito vector, including the use of  
53 insecticides and biological/genetic manipulation of primary vector species. The  
54 introduction of the bacterial symbiont *Wolbachia* to reduce flavivirus infection in the major  
55 arbovirus vector species *Aedes aegypti* (Aliota et al., 2016; Dutra et al., 2016; Haqshenas et  
56 al., 2019) and the release of genetically modified individuals to reduce transmission-  
57 competent progeny of this species (Waltz, 2021) have been included among the latter  
58 strategies. There is evidence to suggest that *Wolbachia*, while effective in reducing ZIKV  
59 and dengue virus (DENV) infection in targeted species may inadvertently enhance  
60 replication of West Nile virus (WNV) (Dodson et al., 2014). It is also not known how  
61 effective or advantageous genetically modified mosquito populations are compared to wild  
62 type populations or to other various viruses (Evans et al., 2019; Resnik, 2017). Because of  
63 these challenges, additional strategies to reduce vector transmission of these important  
64 viral pathogens are critically needed.

65           As an alternative strategy, it may be possible to reduce or block arborvirus  
66 transmission through mosquito-targeted delivery of bioactive small molecules at attractive  
67 sugar bait stations, a modification of the successful delivery of toxic baits for mosquito  
68 control (Dong and Dimopoulos, 2021). To this end, it is necessary to identify druggable  
69 mosquito antiviral effectors and their upstream regulatory factors. The insulin/insulin-like  
70 growth factor signaling (IIS) cascade regulates RNA interference (RNAi) and JAK/STAT  
71 antiviral immunity against West Nile virus (WNV), dengue virus (DENV), and ZIKV (Ahlers  
72 et al., 2019; Trammell and Goodman, 2019). In *Drosophila melanogaster*, the IIS-dependent  
73 transcription factor forkhead box O (FOXO) induces expression of RNAi transcripts *AGO2*  
74 and *Dicer-2* (Spellberg and Marr, 2015). We demonstrated that ingestion of exogenous  
75 insulin reduced expression of these RNAi components in WNV-infected *Culex*  
76 *quinquefasciatus* (Ahlers et al., 2019) and that manipulation of IIS-dependent extracellular-  
77 signal regulated kinases (ERK) activation reduced WNV infection in this mosquito host  
78 (Ahlers et al., 2019). Further, insulin treatment suppressed the activation of RNAi, while  
79 activating ERK-dependent JAK/STAT induction of unpaired (upd) ligands to control WNV  
80 replication *in vitro* and *in vivo* (Ahlers et al., 2019). Previous studies established that both  
81 JAK/STAT and RNAi antiviral pathways are independently involved in arthropod antiviral  
82 immunity to ZIKV (Harsh et al., 2018, 2020; Xu et al., 2019). To date, however, no  
83 mechanism(s) have been established whereby both antiviral pathways are induced  
84 simultaneously in response to arthropod infection.

85           In this study, we repurposed small molecules that target IIS pathway proteins to  
86 induce simultaneous activation of RNAi and JAK/STAT signaling in *Ae. aegypti*. Specifically,  
87 we used the potent insulin mimetic demethylasterriquinone B1 (DMAQ-B1), an activating

88 ligand of the insulin receptor (InR) (Zhang et al., 1999) and Protein kinase B (AKT)  
89 inhibitor VIII, which reduces AKT phosphorylation (Lindsley et al., 2005). Small molecule  
90 treatment induced activation of JAK/STAT via ERK and blocked inhibition of RNAi via the  
91 AKT/FOXO signaling axis. Combined treatment with DMAQ-B1 and AKT inhibitor VIII  
92 significantly lowered ZIKV titers in *Ae. aegypti* cells and adult female mosquitoes relative to  
93 single treatment and vehicle control. Combined treatment also additively reduced salivary  
94 gland virus titers, a surrogate measure of reduced transmission efficacy (Ferguson et al.,  
95 2015; Raquin and Lambrechts, 2017). Accordingly, we argue that activation of both  
96 antiviral pathways resulted in enhanced defenses that lowered viral titers to non-  
97 detectable levels. This work demonstrates the feasibility of strategically targeting mosquito  
98 immunity via IIS is a means of reducing a clinically relevant strain of ZIKV infection and  
99 transmission at the vector level.

100

## 101 **RESULTS**

102 *DMAQ-B1 and AKT inhibitor VIII activated Aedes aegypti insulin and antiviral signaling*  
103 *pathways*

104 Since the JAK/STAT and RNAi antiviral pathways are linked to IIS, we sought to test  
105 the activity of small molecules against phosphorylation of key IIS protein targets and  
106 activity of these antiviral pathways. Given that phosphorylation of AKT and ERK correlate  
107 with activation of IIS and JAK/STAT signaling (Ahlers et al., 2019; Boulton et al., 1991),  
108 respectively, and that FOXO phosphorylation is consistent with suppression of RNAi (Biggs  
109 et al., 1999; Brunet et al., 1999; Spellberg and Marr, 2015), we used these readouts to  
110 evaluate the efficacy of DMAQ-B1 and AKT inhibitor VIII control of RNAi and JAK/STAT.

111 Protein lysates from *Ae. aegypti* Aag2 cells treated with 1% DMSO vehicle, 1  $\mu$ M  
112 DMAQ-B1, 10  $\mu$ M AKT inhibitor VIII, or these combined drug treatment for 24 hours were  
113 analyzed by western blot for phosphorylation of AKT, FOXO, and ERK (**Fig. 1A**). Drug  
114 concentrations were based on prior toxicity analysis (**Fig. S1**). DMAQ-B1 treatment was  
115 associated with the highest levels of AKT and FOXO phosphorylation; this phosphorylation  
116 was significantly reduced when combined with AKT inhibitor VIII (**Fig. 1B-C**). Single drug  
117 and combined drug treatments were associated with increased ERK phosphorylation  
118 relative to vehicle control (**Fig. 1D**). We validated these findings by immunofluorescence  
119 microscopy of 24 h treated cells probed for phospho-FOXO (P-FOXO) and P-ERK.  
120 Consistent with western blot analyses, we observed increased P-FOXO only in the DMAQ-  
121 B1-treated cells and P-ERK in both individual and combined-treated cells (**Fig. 1E**).  
122 Further, P-FOXO localization was primarily cytosolic (**Fig. 1F**) in DMAQ-B1 treated cells  
123 and P-ERK localization was primarily nuclear (**Fig. 1G**) in AKT inhibitor and combined  
124 treated cells, confirming that the transcription factors involved in RNAi and JAK/STAT  
125 induction are both nuclear and transcriptionally active under the expected treatment  
126 conditions. We also observed increased transcript expression of *AGO2* and *virus-induced*  
127 *RNA-1* (*vir-1*) which are indicative of RNAi and JAK/STAT activation, respectively, in cells  
128 treated with the combined drugs (**Fig. 1H-I**). Collectively, these data indicated that DMAQ-  
129 B1 and AKT inhibitor VIII treatment alter IIS phosphorylation in *Ae. aegypti* cells in a  
130 pattern consistent with the activation of FOXO- and ERK-dependent antiviral signaling.

131 Based on these effects on RNAi and JAK/STAT signaling in the absence of virus, we  
132 sought to determine the effects of single and combined drugs on ZIKV replication in *Ae.*  
133 *aegypti* cells. Aag2 cells were primed with individual and combined drugs for 24 h prior to

134 infection with the clinically isolated PRVABC59 strain of ZIKV (**Fig. 1J**). We observed  
135 significant reductions in ZIKV titer in cells treated with individual and combined drugs by 3  
136 days post-infection (dpi). Most notably, ZIKV titers were undetectable by 3 dpi in cells  
137 treated with the combined drugs (**Fig. 1J**). Patel and Hardy (2012) showed that AKT  
138 inhibitor VIII was antiviral in Sindbis virus (SINV)-infected *Aedes albopictus* C6/36 cells,  
139 but the dysfunctional RNAi response in these cells (Brackney et al., 2010) precluded the  
140 confirmation of mechanism in its entirety. Accordingly, we concluded that DMAQ-B1 and  
141 AKT inhibitor VIII treatments induced an antiviral response that was increased to the point  
142 of non-detectable ZIKV titers when these treatments were combined .

143

144 *DMAQ-B1 and AKT inhibitor VIII treatment of ZIKV-infected Aedes aegypti induced*  
145 *simultaneous activation of RNAi and JAK/STAT signaling*

146 Based on IIS-dependent antiviral activity of DMAQ-B1 and AKT inhibitor VIII *in*  
147 *vitro*, we sought to evaluate whether similar drug effects could be detected in *Ae. aegypti*  
148 adult females. Aged-matched 6–9-day old female mosquitoes were fed a ZIKV-containing  
149 bloodmeal including vehicle, individual, or combined 10  $\mu$ M DMAQ-B1 and 10  $\mu$ M AKT  
150 inhibitor VIII. Drug concentrations were selected based on mortality studies to measure  
151 drug lethality to mosquitoes over a dose range (**Fig. S2**). Mosquitoes were collected at 3, 7,  
152 and 11 dpi, timepoints that corresponded with complete digestion of the blood meal,  
153 progression of viremia into distal tissues, and virus infection of the salivary glands (Roundy  
154 et al., 2017; Weger-Lucarelli et al., 2016; Williams et al., 2020). Expression levels of RNAi  
155 and JAK/STAT signaling gene products were quantified by qRT-PCR at 7 dpi (**Figs. 2A-D**)  
156 and 11 dpi (**Fig. 2E-H**). *AGO2* and *p400* were examined as markers of RNAi (**Figs. 2A-B, 2E-**

157 **F)** (Bernhardt et al., 2012; McFarlane et al., 2020), while *Vago2* and *vir-1* were examined as  
158 downstream effectors of JAK/STAT (**Figs. 2C-D, 2G-H**) (Asad et al., 2018; Diop et al., 2019).  
159 As in Aag2 cells, we observed that the combination drug treatment resulted in higher  
160 expression of RNAi and JAK/STAT signaling gene products at 7dpi (**Figs. 2A-D**).  
161 Interestingly, at 11 dpi, only transcript levels for *AGO2* remained significantly higher for  
162 individual drug- and combination drug-treated mosquitoes (**Figs. 2E-H**). Based on high  
163 transcript expression at 3 dpi in mosquitoes treated with the drug combination (**Fig. S3**),  
164 loss of gene induction between 7 and 11 dpi suggests that drug treatment may have a  
165 limited efficacy by 11 days-post bloodmeal.

166

167 *DMAQ-B1 and AKT inhibitor treatment reduced infection prevalence and ZIKV titer in Aedes*  
168 *aegypti*

169 We next sought to evaluate the effects of individual and combined drug treatments  
170 on infection prevalence and ZIKV titers in adult mosquitoes. Mosquitoes were fed a ZIKV-  
171 containing bloodmeal treated with vehicle, DMAQ-B1, AKT inhibitor VIII, or combined drug  
172 treatment as described. We collected mosquitoes at 3, 7, and 11 dpi and analyzed  
173 individual midguts, pairs of salivary glands, and carcasses for ZIKV titers (n=30). There  
174 were no differences in virus infection prevalence or viral titers at 3 dpi (**Fig S4**). However,  
175 by 7 dpi (**Figs. 3A-C**) and 11 dpi (**Figs. 3G-I**), infection prevalence was reduced relative to  
176 vehicle control in mosquitoes treated with individual and combined drug treated  
177 mosquitoes. Viral titers in ZIKV-positive mosquitoes were reduced relative to vehicle  
178 control less than two-fold at 7 dpi (**Figs. 3D-F**), but this reduction was greater than two-  
179 fold at 11 dpi (**Figs. 3J-L**). Notably, infection prevalence and salivary gland viral titers were



180 reduced in combined drug-treated mosquitoes at 11 dpi, a time consistent with virus  
181 transmission during feeding (Armstrong et al., 2020; Sánchez-Vargas et al., 2018).  
182 Mosquitoes that received combined drug treatment were not only less likely to be ZIKV-  
183 positive, but among those individuals that were ZIKA-positive, salivary gland viral load was  
184 substantially reduced. Average gland viral load at 11 dpi ( $1.7\log_{10}\pm 1.5$  PFU/mL) was  
185 below titers previously associated with successful virus transmission ( $4.8\log_{10}\pm 0.6$   
186 PFU/mL) (Vazeille et al., 2019). These observations suggest that combined drug treatment  
187 and coordinated activation of RNAi and JAK/STAT provides antiviral immunity against  
188 ZIKV that effectively reduced infection prevalence and viral titers below reported  
189 transmissible levels. These effects of combined drug treatment would be predicted,  
190 therefore, to reduce mosquito transmission of ZIKV.

191

192 *Inhibition of RNAi and JAK/STAT signaling resulted in loss of drug-mediated antiviral*  
193 *protection*

194 To confirm that DMAQ-B1 and AKT inhibitor VIII mediate RNAi- and JAK/STAT-  
195 dependent antiviral responses, we transfected Aag2 cells with siRNA constructs to  
196 knockdown expression of *AGO2* and *vir-1*. Cells were transfected with siRNAs that targeted  
197 either gene individually (siAGO2, siVir-1) or stacked gene expression (siAGO2 + siVir-1)  
198 (Terradas et al., 2017). We observed significantly reduced gene expression at 48 h post  
199 transfection for both individual and stacked siRNA treatments compared to cells that were  
200 treated with control, non-targeting siRNAs (Clemons et al., 2011) Individual siRNA treated  
201 cells exhibited a 69% and 68% reduction in *vir-1* and *AGO2*, respectively, compared to the  
202 control siRNA-treated cells. Stacked siRNA treated cells exhibited a 79% and 84%

203 reduction in *vir-1* and *AGO2*, respectively, compared to control siRNA-treated cells (**Figs.**  
204 **4A and 4B**). Next, we treated cells at 48 h after siRNA transfection with vehicle, individual,  
205 or combined drug treatments for 24 h prior to ZIKV infection. Viral titers were measured in  
206 supernatants collected at 2 dpi to determine if antiviral protection was impacted in the  
207 absence of antiviral RNAi, JAK/STAT, or both. We observed that both individual and  
208 combined *AGO2* and *vir-1* knockdowns resulted in significant losses of drug-mediated  
209 antiviral protection relative to drug-treated controls (**Fig. 4C**). Interestingly, while we  
210 observed a loss in antiviral protection between pair-wise treatment conditions, we did not  
211 observe a significant difference in viral titers among siRNA transfections. These results  
212 suggested that IIS-dependent RNAi and JAK/STAT signaling are sufficient to significantly  
213 reduce ZIKV titers, but other pathways may also contribute to this biology. For example,  
214 despite the reduction in ZIKV to undetectable levels via IIS-dependent antiviral immunity,  
215 Toll signaling (Angleró-Rodríguez et al., 2017) and autophagy (Liu et al., 2018) could  
216 contribute to control of ZIKV replication. Collectively, our data suggest that repurposing  
217 small molecule drugs to target mosquito IIS can induce antiviral responses that  
218 significantly reduce ZIKV infection prevalence and transmission potential in *Ae. aegypti*  
219 through activation of RNAi and JAK/STAT signaling.

220

## 221 **DISCUSSION**

222 Global climate change has enabled the expansion of mosquito populations into new  
223 ranges with concomitant increases in the variety and incidence of mosquito-borne  
224 diseases. Recent ZIKV epidemics have demonstrated the need for host-virus interactions  
225 research to identify novel drug targets and for the development of more effective means of

226 vector control. Current vector control efforts involving microbiota or genetic  
227 manipulations, while promising, could be enhanced by the addition of antiviral drug  
228 strategies to ongoing control efforts.

229 In the present work, we evaluated the therapeutic potential of IIS-targeted small  
230 molecules to reduce ZIKV infection prevalence and titers in *Ae. aegypti*. We demonstrated  
231 that the potent insulin mimetic DMAQ-B1 and the AKT inhibitor VIII synergized IIS-  
232 mediated antiviral immunity in *Ae. aegypti* to reduce ZIKV infection prevalence and titers in  
233 infected mosquitoes (**Fig. 4D**). While this study is not the first to identify IIS regulation of  
234 antiviral immunity, we have advanced this field by demonstrating that readily available and  
235 potent IIS-targeted small molecules induced substantial and significant antiviral immunity  
236 in *Ae. aegypti* against a clinically virulent strain of ZIKV. By targeting IIS as a mediator of  
237 two independent antiviral pathways, we reduced not only infection prevalence but also  
238 virus titers below levels previously associated with successful transmission. Both of these  
239 effects would be predicted to reduce ZIKV transmission by the primary vector *Ae. aegypti*.  
240 In demonstrating these effects, we have also provided a foundation for future translation of  
241 our findings to the field. Specifically, we seek to advance small molecule delivery via  
242 attractive bait stations to induce IIS-mediated, broad antiviral immunity in mosquitoes that  
243 ingest these compounds.

244 Of particular interest for a potential field-based strategy is the broad impact that IIS  
245 appears to have across species. Previous studies have confirmed that exogenous treatment  
246 with or the endogenous effects of insulin in *D. melanogaster* and *Culex* spp. reduced  
247 replication of both WNV and DENV (Ahlers et al., 2019; Xu et al., 2013). Interestingly, the  
248 antiviral effects of IIS during ZIKV infection are not limited to arthropod species. In

249 mammalian models, ZIKV NS4A/NS4B activates PI3K-AKT signaling that is associated with  
250 neurogenetic dysregulation (Liang et al., 2016). Further, the broadly antiviral celecoxib  
251 kinase inhibitor AR-12 and AKT inhibitor VIII have been shown to reduce ZIKV replication  
252 and pathogenesis in mice by blocking PI3K-AKT activation (Chan et al., 2018). It is also  
253 established that diabetic individuals with dysfunctional IIS are more susceptible to severe  
254 disease during WNV (Kumar et al., 2012, 2014), DENV (Lee et al., 2020), and ZIKV infection  
255 (Nielsen and Bygbjerg, 2016). Given the variety of mosquito species that deploy IIS-  
256 dependent immunity against notable major arboviruses, it would be worth investigating  
257 whether similarly broad IIS regulation of antiviral responses can be detected in mammalian  
258 hosts. If so, it may be possible to develop IIS-targeted transmission blocking therapeutic  
259 drugs that mitigate Zika disease and, when delivered in blood from treated patients to *Ae.*  
260 *aegypti*, reduce infection in and transmission by the mosquito vector.

261

## 262 **ACKNOWLEDGEMENTS**

263 We thank A. Nicola, S. O'Neill, G. Ebel, and K. Olson for cells, viruses, and mosquitoes used in  
264 these experiments. We thank G. Terradas and E. McGraw for providing siRNA sequences.  
265 We also like to thank S. Bennett, C. Blair, and B. Foy, amongst others of the Center for  
266 Vector-borne Infectious Diseases, for assistance with mosquito husbandry and feedback  
267 regarding experimental design. We also thank L.R.H Ahlers for critical reading of our  
268 manuscript. This research was supported by the WSU College of Veterinary Medicine  
269 Stanley L. Adler research fund to A.G.G, NIH / National Institute of General Medical Sciences  
270 (NIGMS)-funded pre-doctoral fellowship (T32 GM008336) and a Poncin Fellowship to

271 C.E.T., NIH/NIAID grant R01AI151166 to I.S.V. and R.P., and University of Idaho and UI  
272 College of Agricultural and Life Sciences startup funds to S.L..

273

## 274 **AUTHOR CONTRIBUTIONS**

275 Conceptualization, C.E.T. and A.G.G.; Methodology, C.E.T., G.R., I.S.V., R.P., S.L., and A.G.G.;  
276 Validation, C.E.T., G.R., and I.S.V.; Investigation, C.E.T., G.R., I.S.V., R.P., and A.G.G; Resources,  
277 I.S.V., R.P., S.L., and A.G.G.; Writing – Original Draft, C.E.T.; Writing – Review and Editing,  
278 G.R., I.S.V., R.P., S.L., and A.G.G.; Visualization, C.E.T. and A.G.G.; Funding Acquisition, C.E.T.,  
279 I.S.V., R.P., S.L., and A.G.G.

280

## 281 **DECLARATION OF INTERESTS**

282 The authors declare no competing interests.

283

## 284 **FIGURE CAPTIONS**

### 285 **Figure 1: DMAQ-B1 and AKT inhibitor VIII activated RNAi and JAK/STAT *in vitro*.**

286 Aag2 cells were treated with vehicle (DMSO), 1  $\mu$ M DMAQ-B1, 10  $\mu$ M AKT inhibitor VIII, or  
287 combined drugs for 24 h. (A-D) Phosphorylation of AKT, FOXO, and ERK were measured by  
288 western blot and phosphorylation was quantified for (B) P-AKT, (C) P-FOXO, and (D) P-ERK  
289 by densitometry and normalized to actin (\* $p < 0.05$ , One-way ANOVA with Tukey's test  
290 correction for multiple comparisons). (E) P-FOXO and P-ERK abundance and localization  
291 were visualized in DAPI-stained Aag2 cells by immunofluorescence microscopy. (F-G)  
292 Protein localization of (F) P-FOXO and (G) P-ERK was quantified in microscopy images to  
293 evaluate whether fluorescent-tagged proteins was cytosolic or nuclear within individual

294 cells by manually counting cells in images (\*\* $p < 0.001$ , Two-way ANOVA with Tukey's  
295 correction). (H-I) Induction of RNAi and JAK/STAT signaling was evaluated as transcript  
296 levels of (H) *AGO2* and (I) *vir-1* by qRT-PCR (\* $p < 0.05$ ; \*\* $p < 0.01$ , Unpaired t test with  
297 Welch's correction for multiple comparisons). (J) Aag2 cells that received vehicle,  
298 individual, or combined drug treatment for 24 h were infected with ZIKV (MOI 0.01) and  
299 supernatant was collected at 1 and 3 dpi. Supernatant virus was titered by standard plaque  
300 assay (\*\* $p < 0.001$ , Two-way ANOVA with uncorrected Fisher's LSD). Closed circles  
301 represent individual replicates. Horizontal bars represent mean and error bars represent  
302 SD. Results are representative of triplicate independent experiments.

303

304 **Figure 2: Combined drug treatment induced activation of RNAi and JAK/STAT in**  
305 ***Aedes aegypti* at 7 dpi that was reduced by 11 dpi.** Induction of RNAi and JAK/STAT  
306 gene transcripts at (A-D) 7 dpi and (E-H) 11 dpi was measured in whole mosquitoes  
307 infected with ZIKV and treated with vehicle, 10  $\mu$ M DMAQ-B1, 10  $\mu$ M AKT inhibitor VIII, or  
308 combined drugs. Transcripts were measured for (A, E) *AGO2*, (B, F) *p400*, (C, G) *Vago2*, and  
309 (D, H) *vir-1* by qRT-PCR (\* $p < 0.05$ ; \*\* $p < 0.01$ ; \*\*\* $p < 0.001$ ; \*\*\*\* $p < 0.0001$ , Unpaired t test  
310 with Welch's correction for multiple comparisons). Closed circles represent individual  
311 replicates. Horizontal bars represent mean and error bars represent SD. Results represent  
312 duplicate independent experiments.

313

314 **Figure 3: Individual and combined drug treatments reduced infection prevalence**  
315 **and ZIKV titers in *Aedes aegypti*.** Individual mosquito midguts, pairs of salivary glands,  
316 and carcasses (n=30) were titered for ZIKV by standard plaque assay at (A-F) 7dpi and (G-

317 L) 11 dpi. (A-C, G-I) Infection prevalence was calculated as the ratio of ZIKV-positive  
318 samples to the total sample size (\*p < 0.05; \*\*p<0.01; \*\*\*p<0.001, Two-tailed Fisher's exact  
319 test). (D-F, J-L) Viral titers were determined in ZIKV-positive mosquitoes (\*p<0.05;  
320 \*\*p<0.01; \*\*\*p<0.001; \*\*\*\* p<0.0001, Unpaired t test with Welch's correction for multiple  
321 comparisons).

322

323 **Figure 4: Knockdown of RNAi and JAK/STAT signaling resulted in loss of drug-**  
324 **mediated antiviral protection.** (A-B) AGO2 and vir-1 were knocked down in Aag2 cells  
325 and transcript levels were determined for (A) *AGO2* and (B) *vir-1* by qRT-PCR for cells  
326 transfected with scramble control (siControl), individual siRNA construct, or stacked siRNA  
327 (siAGO2+siVir-1) (\*\*p<0.01; \*\*\*p<0.001; \*\*\*\* p<0.0001, Unpaired t test with Welch's  
328 correction). (C) 48 h following transfection, cells were primed with DMAQ-B1 or AKT  
329 inhibitor VIII for 24 h prior to infection with ZIKV (MOI=0.01 PFU/cell). Supernatant was  
330 collected at 2 dpi and virus was titered by standard plaque assay (\*p<0.05; \*\*p<0.01;  
331 \*\*\*p<0.001 Two-way ANOVA with uncorrected Fisher's LSD test). (D) Schematic of  
332 proposed mechanism of action mediated by DMAQ-B1 and AKT inhibitor VIII during ZIKV  
333 infection through simultaneous induction of antiviral RNAi and JAK/STAT signaling.

334

## 335 MATERIALS AND METHODS

### 336 CONTACT FOR REAGENT AND RESOURCE SHARING

337 Further information and requests for resources and reagents should be directed to and will  
338 be fulfilled by the Lead Contact, Alan Goodman ([alan.goodman@wsu.edu](mailto:alan.goodman@wsu.edu)).

339

### 340 EXPERIMENTAL MODEL AND SUBJECT DETAILS

#### 341 Mosquito rearing

342 *Aedes aegypti* strain Poza Rica , from the state of Veracruz, Mexico were originally  
343 collected in 2012, and maintained as described (Weger-Lucarelli et al., 2016). Adult  
344 mosquitoes were provided continuous access to water and 10% sucrose *ad libitum*, and the  
345 females were allowed to feed on defibrinated sheep blood (Colorado Serum Company)  
346 supplemented with 1mM ATP using an artificial feeding system to stimulate oogenesis. .  
347 Larvae were reared and maintained under constant 28 °C, 70% humidity, and 12-hour  
348 light, 12 hour dark diurnal cycle. 6-9 day old adult female mosquitoes were deprived of  
349 sucrose 24 hours prior to experimental feedings as described (Weger-Lucarelli et al.,  
350 2016). Mosquito infections, maintenance, and plaque assays were performed under BSL3  
351 and ACL3 facilities, approved by Colorado State University's Institutional Biosafety  
352 Committee 16-074B.

353

#### 354 Cells and virus

355 Vero cells (ATCC, CRL-81) were provided by A. Nicola and cultured at 37 °C/5% CO<sub>2</sub> in  
356 DMEM (ThermoFisher 11965) supplemented with 10% FBS (Atlas BiologicalsFS-0500-A)  
357 and 1x antibiotic-antimycotic (ThermoFisher 15240062). *Ae. aegypti* Aag2 cells



358 (*Wolbachia*-free) (Terradas et al., 2017) were gifted by S. O'Neill and cultured as described  
359 (Terradas et al., 2017). For drug treatment, culture media with 2% FBS were supplemented  
360 with 1% DMSO, 1  $\mu$ M DMAQ-B1, 10  $\mu$ M AKT inhibitor VIII, or combined drugs.  
361 Concentrations of DMAQ-B1 and AKT inhibitor VIII were selected at non-cytotoxic levels  
362 for both cell culture (**Figure S1**) and adult mosquitoes (**Figure S2**). ZIKV strain PRVABC59  
363 (Accession # KU501215) was obtained from the CDC and was isolated in 2015 from a  
364 clinical case in Puerto Rico and prepared as described (Weger-Lucarelli et al., 2016).

365

## 366 **METHOD DETAILS**

### 367 ***In vitro* replication**

368 Aag2 cells were seeded into a 24-well plate at a confluency of  $5 \times 10^5$  cells/well with 6  
369 independent wells for each experimental condition. The following day, cells were treated  
370 with 1% DMSO, 1  $\mu$ M DMAQ-B1, 10  $\mu$ M AKT inhibitor VIII, or combined drugs in 2% FBS  
371 media as described (Ahlers et al., 2019) for 24 h prior to infection. Cells were then infected  
372 with ZIKV at MOI of 0.01 PFU/cell for 1 h. Virus inoculum was removed, and fresh  
373 experimental media was added. Supernatant samples were collected at 1 and 3 dpi for later  
374 titration. ZIKV titers were determined by standard plaque assay on Vero cells (Baer and  
375 Kehn-Hall, 2014; Sanchez-Vargas et al., 2021).

376

### 377 **Cytotoxicity of DMAQ-B1 and AKT inhibitor VIII**

378 Cytotoxicity of DMAQ-B1 and AKT inhibitor VIII was evaluated in both cell culture and in  
379 adult female *Ae. aegypti*. DMAQ-B1 and AKT inhibitor VIII was added to a monolayer of  
380  $2.5 \times 10^5$  cells/well in 48-well plates at various concentrations (100  $\mu$ M, 10  $\mu$ M, 1  $\mu$ M, 0.1

381  $\mu\text{M}$ ). Cells were collected at 1, 2, and 3 d post-treatment, stained with trypan blue  
382 (ThermoFisher 15250-061) and scored as live or dead as described (Ahlers et al., 2016).  
383 Combined DMAQ-B1 and AKT inhibitor VIII cytotoxicity was evaluated using the maximum  
384 individual concentrations that corresponded to minimal cytotoxicity. A total of eight  
385 technical replicates were averaged for each biological replicate. 1% DMSO treated and 1%  
386 Triton X-100 treated cells were also scored as negative and positive controls, respectively.  
387 Cytotoxicity was evaluated similarly in 6-9 day old female mosquitoes exposed to a  
388 bloodmeal containing small molecule drugs (100  $\mu\text{M}$ , 10  $\mu\text{M}$ , 1  $\mu\text{M}$ ), 1% DMSO vehicle  
389 control, or blood only. Following 1 h of feeding, engorged females were kept and  
390 maintained on sucrose for 14 d to monitor mortality. Combined small molecule drug  
391 treatment was evaluated using observed lethal and nonlethal individual concentrations.  
392 Each experimental group contained approximately 70-100 mosquitoes.

393

#### 394 **Immunoblotting**

395 Protein extracts were prepared by lysing cells with RIPA buffer (25 mM Tris-HCl pH 7.6,  
396 150 mM NaCl, 1 mM EDTA, 1% NP-40, 1% sodium deoxycholate, 0.1% SDS, 1mM  $\text{Na}_3\text{VO}_4$ , 1  
397 mM NaF, 0.1 mM PMSF, 10  $\mu\text{M}$  aprotinin, 5  $\mu\text{g}/\text{mL}$  leupeptin, 1  $\mu\text{g}/\text{mL}$  pepstatin A). Protein  
398 samples were diluted using 2x Laemmli loading buffer, mixed, and boiled for 5 minutes at  
399 95 °C. Samples were analyzed by SDS/PAGE using a 10% acrylamide gel, followed by  
400 transfer onto PVDF membranes (Millipore IPVH00010). Membranes were blocked with 5%  
401 BSA (ThermoFisher BP9706) in Tris-buffered saline (50 mM Tris-HCl pH 7.5, 150 mM  
402 NaCl) and 0.1% Tween-20 for 1 h at room temperature.

403

404 Primary antibody labeling was completed with anti-P-Akt (1:1,000; Cell Signaling 4060),  
405 anti-P-ERK (1:1000; Sigma M8159), anti-P-FOXO (1:1000; Millipore 07-695), or anti-actin  
406 (1:10,000; Sigma A2066) overnight at 4 °C. Secondary antibody labeling was completed  
407 using anti-rabbit IgG-HRP conjugate (1:10,000; Promega W401B) or anti-mouse IgG-HRP  
408 conjugate (1:10,000; Promega W402B) by incubating membranes for 2 h at room  
409 temperature. Blots were imaged onto film using luminol enhancer (ThermoFisher  
410 1862124). Densitometry analysis was completed using three independent blots using  
411 BioRad Image Lab with bands normalized to actin.

412

### 413 **RNA interference *in vitro***

414 Long dsRNA targeting *Ae. aegypti* *AGO2*, *vir-1*, and non-targeting control dsRNA was  
415 synthesized as described (Terradas et al., 2017). Targeted sequences and primers are listed  
416 in **Table S1**. dsRNA was transfected into Aag2 cells as described (Terradas et al., 2017) for  
417 48 h prior to small molecule treatment and infection. RNA was extracted and purified to  
418 confirm reduced expression by qRT-PCR and viral concentration was confirmed by  
419 standard plaque assay.

420

### 421 **Quantitative reverse transcriptase PCR**

422 qRT-PCR was used to measure mRNA levels in *Ae. aegypti* Aag2 cells and adult females.  
423 Cells or mosquitoes were lysed with Trizol Reagent (ThermoFisher 15596). RNA was  
424 isolated by column purification (ZymoResearch R2050), DNA was removed (ThermoFisher  
425 18068), and cDNA was prepared (BioRad 170-8891). Expression of *Ae. aegypti* *AGO2*, *p400*,  
426 *Vago2*, and *vir-1* were measured using SYBR Green reagents (ThermoFisher K0222) and

427 normalized to *actin*. The reaction for samples included one cycle of denaturation at 95 °C  
428 for 10 minutes, followed by 45 cycles of denaturation at 95 °C for 15 seconds and extension  
429 at 60 °C for 1 minute, using an Applied Biosystems 7500 Fast Real Time PCR System. ROX  
430 was used as an internal control. qRT-PCR primer sequences are listed in **Table S1**.

431

### 432 **Immunofluorescence microscopy**

433 *Ae. aegypti* Aag2 cells were seeded onto coverslips in 12-well plates at a confluency of  
434 approximately  $1 \times 10^6$  cells/well. Cells were then treated for 24 hours with 1% DMSO, 1  $\mu$ M  
435 DMAQ-B1, 10  $\mu$ M AKT inhibitor VIII, or combined small molecule treatment supplemented  
436 in 2% FBS media as described (Ahlers et al., 2019). Coverslips were fixed in 4%  
437 paraformaldehyde for 10 minutes at room temperature, permeabilized in 0.1% Triton-X-  
438 100 for 30 minutes at room temperature and blocked in 1% BSA in TBS for 30 min at 37 °C.  
439 Primary antibody labeling was completed with anti-P-FOXO (1:100) and anti-P-ERK  
440 (1:100) for 2 h at humidified room temperature. Secondary antibody labeling was completed  
441 using anti-rabbit (Life Technologies A11034) or anti-mouse (Life Technologies A11029)  
442 Alexafluor 488 (1:300) by incubating membranes for 1 h at room temperature in the dark.  
443 Samples were stained with DAPI (1:100; Cell Signaling 4083), mounted onto coverslips  
444 using ProLong Diamond Antifade Mountant (Invitrogen P36961), and imaged using a Leica  
445 Sp8X confocal microscope. Localization percentages were determined by counting the total  
446 number of cells and evaluating if green-fluorescent signal was cytosolic, nuclear, or no  
447 signal in relation to DAPI-stained nuclei.

448

### 449 **Mosquito infections**

450 Fresh ZIKV virus stock was made from Vero cells infected at MOI of 0.1 PFU/cell at 72  
451 hours prior to bloodmeal feed of 6-9 day old female mosquitoes as described (Weger-  
452 Lucarelli et al., 2016; Williams et al., 2020). Mosquitoes were fed a bloodmeal  
453 supplemented with 1 mM ATP and infected with the fresh virus inoculum that was back-  
454 titrated to  $2.4 \times 10^6$  PFU/mL. Bloodmeals included 1% DMSO vehicle control, 10  $\mu$ M DMAQ-  
455 B1, 10  $\mu$ M AKT inhibitor VIII, or combined drugs. Following 1 h of feeding, mosquitoes  
456 were anesthetized on ice and engorged mosquitoes were moved into new cartons and  
457 maintained on sucrose. Mosquitoes were collected at 3, 7, and 11 dpi in which the midgut,  
458 salivary glands, and carcass were separated, homogenized, and filtered for infection  
459 determination and viral titering. Whole mosquitoes were collected at the same timepoints  
460 for qRT-PCR analysis.

461

## 462 **QUANTIFICATION AND STATISTICAL ANALYSIS**

463 Results presented as dot plots show data from individual biological replicates (n=3-10) and  
464 the arithmetic mean of the data, shown as a black horizontal line. Biological replicates of  
465 adult mosquitoes (n=2-24) consisted of two pooled mosquitoes. Results shown are  
466 representative of at least duplicate independent experiments, as indicated in the figure  
467 legends. All statistical analyses of biological replicates were completed using GraphPad  
468 Prism 9 and significance was defined as  $p < 0.05$ . One-way ANOVA with Tukey's correction  
469 for multiple comparisons was used for densitometry analysis. Two-way ANOVA with  
470 Tukey's correction for multiple comparisons was used for microscopy localization analysis.  
471 Unpaired t test with Welch's correction was used for qRT-PCR and *in vivo* viral titer  
472 analysis. Two-way ANOVA with uncorrected Fisher's LSD test was used for analysis of

473 multiday *in vitro* viral titer. Two-tailed Fisher's exact test was used to compare infection  
474 prevalences. Two-way ANOVA with Tukey's correction for multiple comparisons was used  
475 for analysis of small molecule cytotoxicity *in vitro* and *in vivo*. All error bars represent  
476 standard deviation (SD) of the mean. Outliers were identified using a ROUT test (Q=5%)  
477 and removed.

478

## 479 SUPPLEMENTAL INFORMATION

480

### 481 Table S1: qRT-PCR Primers

482

### 483 Figure S1: DMAQ-B1 and AKT inhibitor VIII exhibited dose-dependent cytotoxicity in

484 **Aag2 cells.** Aag2 cells were treated with various concentrations of (A) DMAQ-B1, (B) AKT  
485 inhibitor VIII, (C) combined drugs, or DMSO vehicle control and cell viability was measured  
486 by trypan blue exclusion. Cells that received 1% Triton-X-100 treatment were used as a  
487 positive, 100% lethality control. Closed circles represent biological replicates measured in  
488 technical triplicate. Horizontal black bars represent the mean. Error bars represent SD.  
489 Significance was measured by Two-Way ANOVA with 1% DMSO vehicle control (\* $p < 0.01$ ).  
490 Data are representative of triplicate independent experiments.

491

### 492 Figure S2: DMAQ-B1 and AKT inhibitor VIII exhibited minimal, dose-dependent

493 **toxicity to *Ae. aegypti*.** Adult female *Ae. aegypti* were treated with various concentrations  
494 of (A) DMAQ-B1, (B) AKT inhibitor VIII, (C) combined drugs and toxicity was measured by  
495 survival over 14 days. Closed circles represent percent survival of mosquitos (n=60-100)

496 measured in triplicate. Horizontal black bars represent the mean. Error bars represent SD.  
497 Significance was measured by Two-Way ANOVA with 1% DMSO vehicle control (\* $p < 0.05$ ).  
498 Data are representative of duplicate independent experiments.

499

500 **Figure S3: RNAi and JAK/STAT signaling was induced in small molecule treated**  
501 **mosquitoes at 3 dpi.** Induction of (A) *AGO2*, (B) *p400*, (C) *Vago2*, and (D) *vir-1* in adult  
502 female *Ae. aegypti* was measured by qRT-PCR 3 dpi of ZIKV- and drug-containing  
503 bloodmeal. (\* $p < 0.05$ ; \*\* $p < 0.01$ ; \*\*\* $p < 0.001$ ). Open circles represent individual biological  
504 replicates. Horizontal black bars represent the mean. Error bars represent SDs. Data are  
505 representative of duplicate independent experiments.

506

507 **Figure S4: Infection prevalence and ZIKV titers at 3 dpi were not different among**  
508 **small molecule-treated and control *Ae aegypti* at 3 dpi.** *Ae. aegypti* were primed with  
509 1% DMSO, 10  $\mu$ M DMAQ-B1, 10  $\mu$ M AKT inhibitor VIII, or combined drugs and infected with  
510 ZIKV by bloodmeal. Mosquitoes (n=30) were collected at 3 dpi and individual midguts,  
511 pairs of salivary glands, and carcasses were prepared and titered by standard plaque assay.  
512 Infection prevalence was determined by comparing the number of mosquitoes with  
513 detectable virus to the total mosquitoes in the sample. Viral titer was measured in  
514 mosquitoes that were positive for ZIKV. There were no differences in infection prevalence  
515 or viral titers among conditions. Open circles represent biological replicates. Bars  
516 represent the mean. Error bars represent SDs. Data are representative of duplicate  
517 independent experiments.

518

519 **REFERENCES**

520

521 Ahlers, L.R.H., Bastos, R.G., Hiroyasu, A., and Goodman, A.G. (2016). Invertebrate Iridescent  
522 Virus 6, a DNA Virus, Stimulates a Mammalian Innate Immune Response through RIG-I-Like  
523 Receptors. *PLOS ONE* 11, e0166088.

524 Ahlers, L.R.H., Trammell, C.E., Carrell, G.F., Mackinnon, S., Torrevillas, B.K., Chow, C.Y.,  
525 Luckhart, S., and Goodman, A.G. (2019). Insulin Potentiates JAK/STAT Signaling to Broadly  
526 Inhibit Flavivirus Replication in Insect Vectors. *Cell Rep.* 29, 1946-1960.e5.

527 Alaniz, A.J., Carvajal, M.A., Bacigalupo, A., and Cattan, P.E. (2018). Global spatial assessment  
528 of *Aedes aegypti* and *Culex quinquefasciatus*: a scenario of Zika virus exposure. *Epidemiol.*  
529 *Infect.* 147, 1–11.

530 Aliota, M.T., Peinado, S.A., Velez, I.D., and Osorio, J.E. (2016). The wMel strain of *Wolbachia*  
531 Reduces Transmission of Zika virus by *Aedes aegypti*. *Sci. Rep.* 6, 28792.

532 Angleró-Rodríguez, Y.I., MacLeod, H.J., Kang, S., Carlson, J.S., Jupatanakul, N., and  
533 Dimopoulos, G. (2017). *Aedes aegypti* Molecular Responses to Zika Virus: Modulation of  
534 Infection by the Toll and Jak/Stat Immune Pathways and Virus Host Factors. *Front.*  
535 *Microbiol.* 8, 2050.

536 Armstrong, P.M., Ehrlich, H.Y., Magalhaes, T., Miller, M.R., Conway, P.J., Bransfield, A.,  
537 Misencik, M.J., Gloria-Soria, A., Warren, J.L., Andreadis, T.G., et al. (2020). Successive blood  
538 meals enhance virus dissemination within mosquitoes and increase transmission potential.  
539 *Nat. Microbiol.* 5, 239–247.

540 Asad, S., Parry, R., and Asgari, S. (2018). Upregulation of *Aedes aegypti* Vago1 by *Wolbachia*  
541 and its effect on dengue virus replication. *Insect Biochem. Mol. Biol.* 92, 45–52.

542 Baer, A., and Kehn-Hall, K. (2014). Viral Concentration Determination Through Plaque  
543 Assays: Using Traditional and Novel Overlay Systems. *J. Vis. Exp. JoVE* e52065.

544 Bernhardt, S.A., Simmons, M.P., Olson, K.E., Beaty, B.J., Blair, C.D., and Black, W.C. (2012).  
545 Rapid Intraspecific Evolution of miRNA and siRNA Genes in the Mosquito *Aedes aegypti*.  
546 *PLOS ONE* 7, e44198.

547 Bhargavi, B.S., and Moya, A. (2020). Global outbreaks of zika infection by epidemic  
548 observatory (EpiWATCH), 2016-2019. *Glob. Biosecurity* 2.

549 Biggs, W.H., Meisenhelder, J., Hunter, T., Cavenee, W.K., and Arden, K.C. (1999). Protein  
550 kinase B/Akt-mediated phosphorylation promotes nuclear exclusion of the winged helix  
551 transcription factor FKHR1. *Proc. Natl. Acad. Sci.* 96, 7421–7426.

552 Boulton, T.G., Nye, S.H., Robbins, D.J., Ip, N.Y., Radziejewska, E., Morgenbesser, S.D., DePinho,  
553 R.A., Panayotatos, N., Cobb, M.H., and Yancopoulos, G.D. (1991). ERKs: a family of protein-



- 554 serine/threonine kinases that are activated and tyrosine phosphorylated in response to  
555 insulin and NGF. *Cell* 65, 663–675.
- 556 Brackney, D.E., Scott, J.C., Sagawa, F., Woodward, J.E., Miller, N.A., Schilkey, F.D., Mudge, J.,  
557 Wilusz, J., Olson, K.E., Blair, C.D., et al. (2010). C6/36 *Aedes albopictus* Cells Have a  
558 Dysfunctional Antiviral RNA Interference Response. *PLoS Negl. Trop. Dis.* 4, e856.
- 559 Brunet, A., Bonni, A., Zigmond, M.J., Lin, M.Z., Juo, P., Hu, L.S., Anderson, M.J., Arden, K.C.,  
560 Blenis, J., and Greenberg, M.E. (1999). Akt promotes cell survival by phosphorylating and  
561 inhibiting a Forkhead transcription factor. *Cell* 96, 857–868.
- 562 Chan, J.F.-W., Zhu, Z., Chu, H., Yuan, S., Chik, K.K.-H., Chan, C.C.-S., Poon, V.K.-M., Yip, C.C.-Y.,  
563 Zhang, X., Tsang, J.O.-L., et al. (2018). The celecoxib derivative kinase inhibitor AR-12 (OSU-  
564 03012) inhibits Zika virus via down-regulation of the PI3K/Akt pathway and protects Zika  
565 virus-infected A129 mice: A host-targeting treatment strategy. *Antiviral Res.* 160, 38–47.
- 566 Clemons, A., Haugen, M., Le, C., Mori, A., Tomchaney, M., Severson, D.W., and Duman-Scheel,  
567 M. (2011). siRNA-Mediated Gene Targeting in *Aedes aegypti* Embryos Reveals That  
568 Frazzled Regulates Vector Mosquito CNS Development. *PLoS ONE* 6, e16730.
- 569 Diop, F., Alout, H., Diagne, C.T., Bengue, M., Baronti, C., Hamel, R., Talignani, L., Liegeois, F.,  
570 Pompon, J., Morales Vargas, R.E., et al. (2019). Differential Susceptibility and Innate  
571 Immune Response of *Aedes aegypti* and *Aedes albopictus* to the Haitian Strain of the  
572 Mayaro Virus. *Viruses* 11, E924.
- 573 Dodson, B.L., Hughes, G.L., Paul, O., Mataracchiero, A.C., Kramer, L.D., and Rasgon, J.L. (2014).  
574 *Wolbachia* Enhances West Nile Virus (WNV) Infection in the Mosquito *Culex tarsalis*. *PLoS*  
575 *Negl. Trop. Dis.* 8.
- 576 Dong, S., and Dimopoulos, G. (2021). Antiviral Compounds for Blocking Arboviral  
577 Transmission in Mosquitoes. *Viruses* 13, 108.
- 578 Dutra, H.L.C., Rocha, M.N., Dias, F.B.S., Mansur, S.B., Caragata, E.P., and Moreira, L.A. (2016).  
579 *Wolbachia* Blocks Currently Circulating Zika Virus Isolates in Brazilian *Aedes aegypti*  
580 Mosquitoes. *Cell Host Microbe* 19, 771–774.
- 581 Evans, B.R., Kotsakiozi, P., Costa-da-Silva, A.L., Ioshino, R.S., Garziera, L., Pedrosa, M.C.,  
582 Malavasi, A., Virginio, J.F., Capurro, M.L., and Powell, J.R. (2019). Transgenic *Aedes aegypti*  
583 Mosquitoes Transfer Genes into a Natural Population. *Sci. Rep.* 9, 13047.
- 584 Ferguson, N.M., Kien, D.T.H., Clapham, H., Aguas, R., Trung, V.T., Chau, T.N.B., Popovici, J.,  
585 Ryan, P.A., O’Neill, S.L., McGraw, E.A., et al. (2015). Modeling the impact on virus  
586 transmission of *Wolbachia*-mediated blocking of dengue virus infection of *Aedes aegypti*.  
587 *Sci. Transl. Med.* 7, 279ra37-279ra37.

- 588 Haqshenas, G., Terradas, G., Paradkar, P.N., Duchemin, J.-B., McGraw, E.A., and Doerig, C.  
589 (2019). A Role for the Insulin Receptor in the Suppression of Dengue Virus and Zika Virus  
590 in Wolbachia-Infected Mosquito Cells. *Cell Rep.* *26*, 529-535.e3.
- 591 Harsh, S., Ozakman, Y., Kitchen, S.M., Paquin-Proulx, D., Nixon, D.F., and Eleftherianos, I.  
592 (2018). Dicer-2 Regulates Resistance and Maintains Homeostasis against Zika Virus  
593 Infection in *Drosophila*. *J. Immunol.* *201*, 3058–3072.
- 594 Harsh, S., Fu, Y., Kenney, E., Han, Z., and Eleftherianos, I. (2020). Zika virus non-structural  
595 protein NS4A restricts eye growth in *Drosophila* through regulation of JAK/STAT signaling.  
596 *Dis. Model. Mech.* *13*.
- 597 Kumar, M., Roe, K., Nerurkar, P.V., Namekar, M., Orillo, B., Verma, S., and Nerurkar, V.R.  
598 (2012). Impaired Virus Clearance, Compromised Immune Response and Increased  
599 Mortality in Type 2 Diabetic Mice Infected with West Nile Virus. *PLoS ONE* *7*, e44682.
- 600 Kumar, M., Roe, K., Nerurkar, P.V., Orillo, B., Thompson, K.S., Verma, S., and Nerurkar, V.R.  
601 (2014). Reduced immune cell infiltration and increased pro-inflammatory mediators in the  
602 brain of Type 2 diabetic mouse model infected with West Nile virus. *J. Neuroinflammation*  
603 *11*, 80.
- 604 Lee, I.-K., Hsieh, C.-J., Lee, C.-T., and Liu, J.-W. (2020). Diabetic patients suffering dengue are  
605 at risk for development of dengue shock syndrome/severe dengue: Emphasizing the  
606 impacts of co-existing comorbidity(ies) and glycemic control on dengue severity. *J.*  
607 *Microbiol. Immunol. Infect. Wei Mian Yu Gan Ran Za Zhi* *53*, 69–78.
- 608 Liang, Q., Luo, Z., Zeng, J., Chen, W., Foo, S.-S., Lee, S.-A., Ge, J., Wang, S., Goldman, S.A.,  
609 Zlokovic, B.V., et al. (2016). Zika Virus NS4A and NS4B Proteins Deregulate Akt-mTOR  
610 Signaling in Human Fetal Neural Stem Cells to Inhibit Neurogenesis and Induce Autophagy.  
611 *Cell Stem Cell* *19*, 663–671.
- 612 Lindsley, C.W., Zhao, Z., Leister, W.H., Robinson, R.G., Barnett, S.F., Defeo-Jones, D., Jones,  
613 R.E., Hartman, G.D., Huff, J.R., Huber, H.E., et al. (2005). Allosteric Akt (PKB) inhibitors:  
614 discovery and SAR of isozyme selective inhibitors. *Bioorg. Med. Chem. Lett.* *15*, 761–764.
- 615 Liu, Y., Gordesky-Gold, B., Leney-Greene, M., Weinbren, N.L., Tudor, M., and Cherry, S.  
616 (2018). Inflammation-Induced, STING-Dependent Autophagy Restricts Zika Virus Infection  
617 in the *Drosophila* Brain. *Cell Host Microbe* *24*, 57-68.e3.
- 618 McFarlane, M., Almire, F., Kean, J., Donald, C.L., McDonald, A., Wee, B., Lauréti, M., Varjak, M.,  
619 Terry, S., Vazeille, M., et al. (2020). The *Aedes aegypti* Domino Ortholog p400 Regulates  
620 Antiviral Exogenous Small Interfering RNA Pathway Activity and ago-2 Expression.  
621 *MSphere* *5*, e00081-20.
- 622 Nielsen, K.K., and Bygbjerg, I.C. (2016). Zika virus and hyperglycaemia in pregnancy. *The*  
623 *Lancet* *387*, 1812.

- 624 Pan American Health Organization (2015). Epidemiological Alert: Neurological syndrome,  
625 congenital malformations, and Zika virus infection. Implications for public health in the  
626 Americas.
- 627 Pan American Health Organization (2016). PAHO/WHO | Zika Cumulative Cases.
- 628 Patel, R.K., and Hardy, R.W. (2012). Role for the Phosphatidylinositol 3-Kinase-Akt-TOR  
629 Pathway during Sindbis Virus Replication in Arthropods. *J. Virol.* *86*, 3595–3604.
- 630 Raquin, V., and Lambrechts, L. (2017). Dengue virus replicates and accumulates in *Aedes*  
631 *aegypti* salivary glands. *Virology* *507*, 75–81.
- 632 Resnik, D.B. (2017). Field Trials of Genetically Modified Mosquitoes and Public Health  
633 Ethics. *Am. J. Bioeth. AJOB* *17*, 24–26.
- 634 Roundy, C.M., Azar, S.R., Rossi, S.L., Huang, J.H., Leal, G., Yun, R., Fernandez-Salas, I., Vitek,  
635 C.J., Paploski, I.A.D., Kitron, U., et al. (2017). Variation in *Aedes aegypti* Mosquito  
636 Competence for Zika Virus Transmission. *Emerg. Infect. Dis.* *23*, 625–632.
- 637 Samy, A.M., Thomas, S.M., Wahed, A.A.E., Cohoon, K.P., and Peterson, A.T. (2016). Mapping  
638 the global geographic potential of Zika virus spread. *Mem. Inst. Oswaldo Cruz* *111*, 559–  
639 560.
- 640 Sánchez-Vargas, I., Harrington, L.C., Doty, J.B., Black 4th, W.C., and Olson, K.E. (2018).  
641 Demonstration of efficient vertical and venereal transmission of dengue virus type-2 in a  
642 genetically diverse laboratory strain of *Aedes aegypti*. *PLoS Negl. Trop. Dis.* *12*, e0006754.
- 643 Sanchez-Vargas, I., Olson, K.E., and Black, W.C. (2021). The Genetic Basis for Salivary Gland  
644 Barriers to Arboviral Transmission. *Insects* *12*, 73.
- 645 Spellberg, M.J., and Marr, M.T. (2015). FOXO regulates RNA interference in *Drosophila* and  
646 protects from RNA virus infection. *Proc. Natl. Acad. Sci. U. S. A.* *112*, 14587–14592.
- 647 Terradas, G., Joubert, D.A., and McGraw, E.A. (2017). The RNAi pathway plays a small part  
648 in *Wolbachia*-mediated blocking of dengue virus in mosquito cells. *Sci. Rep.* *7*, 43847.
- 649 Trammell, C.E., and Goodman, A.G. (2019). Emerging Mechanisms of Insulin-Mediated  
650 Antiviral Immunity in *Drosophila melanogaster*. *Front. Immunol.* *10*.
- 651 Vazeille, M., Madec, Y., Mousson, L., Bellone, R., Barré-Cardi, H., Sousa, C.A., Jiolle, D.,  
652 Yébakima, A., de Lamballerie, X., and Failloux, A.-B. (2019). Zika virus threshold determines  
653 transmission by European *Aedes albopictus* mosquitoes. *Emerg. Microbes Infect.* *8*, 1668–  
654 1678.
- 655 Waltz, E. (2021). First genetically modified mosquitoes released in the United States.  
656 *Nature* *593*, 175–176.

- 657 Weger-Lucarelli, J., Rückert, C., Chotiwan, N., Nguyen, C., Luna, S.M.G., Fauver, J.R., Foy, B.D.,  
658 Perera, R., Black, W.C., Kading, R.C., et al. (2016). Vector Competence of American  
659 Mosquitoes for Three Strains of Zika Virus. *PLoS Negl. Trop. Dis.* *10*, e0005101.
- 660 Williams, A.E., Sanchez-Vargas, I., Reid, W.R., Lin, J., Franz, A.W.E., and Olson, K.E. (2020).  
661 The Antiviral Small-Interfering RNA Pathway Induces Zika Virus Resistance in Transgenic  
662 *Aedes aegypti*. *Viruses* *12*, 1231.
- 663 Xu, J., Hopkins, K., Sabin, L., Yasunaga, A., Subramanian, H., Lamborn, I., Gordesky-Gold, B.,  
664 and Cherry, S. (2013). ERK signaling couples nutrient status to antiviral defense in the  
665 insect gut. *Proc. Natl. Acad. Sci.* *110*, 15025–15030.
- 666 Xu, Y.-P., Qiu, Y., Zhang, B., Chen, G., Chen, Q., Wang, M., Mo, F., Xu, J., Wu, J., Zhang, R.-R., et  
667 al. (2019). Zika virus infection induces RNAi-mediated antiviral immunity in human neural  
668 progenitors and brain organoids. *Cell Res.* *29*, 265.
- 669 Zhang, B., Salituro, G., Szalkowski, D., Li, Z., Zhang, Y., Royo, I., Vilella, D., Díez, M.T., Pelaez,  
670 F., Ruby, C., et al. (1999). Discovery of a small molecule insulin mimetic with antidiabetic  
671 activity in mice. *Science* *284*, 974–977.
- 672

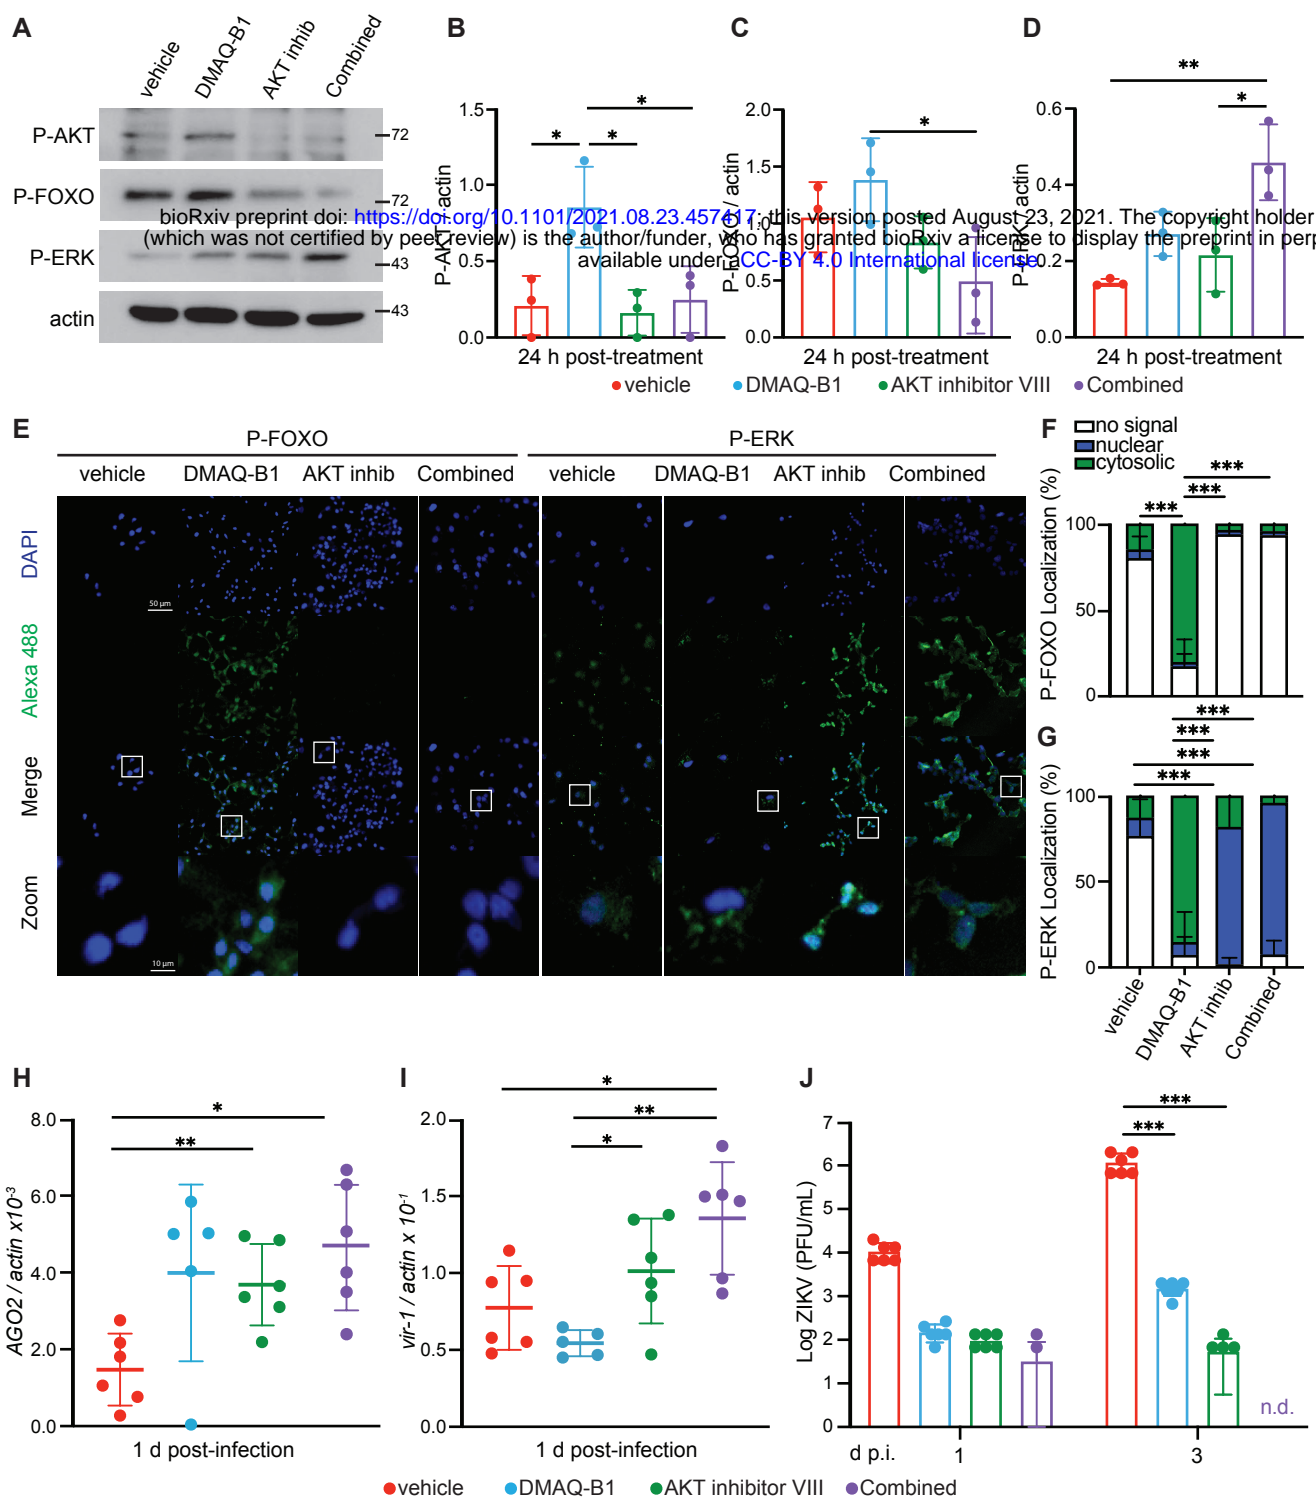

Figure 1

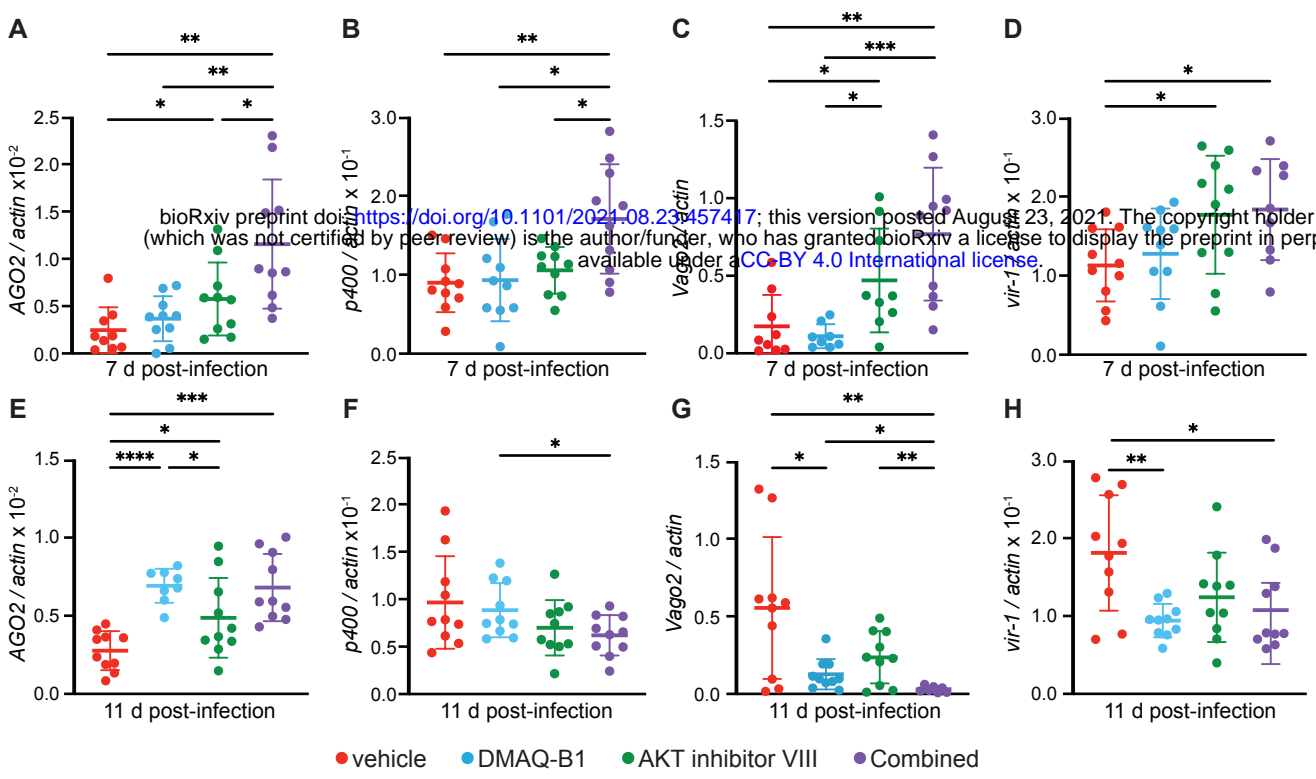

Figure 2

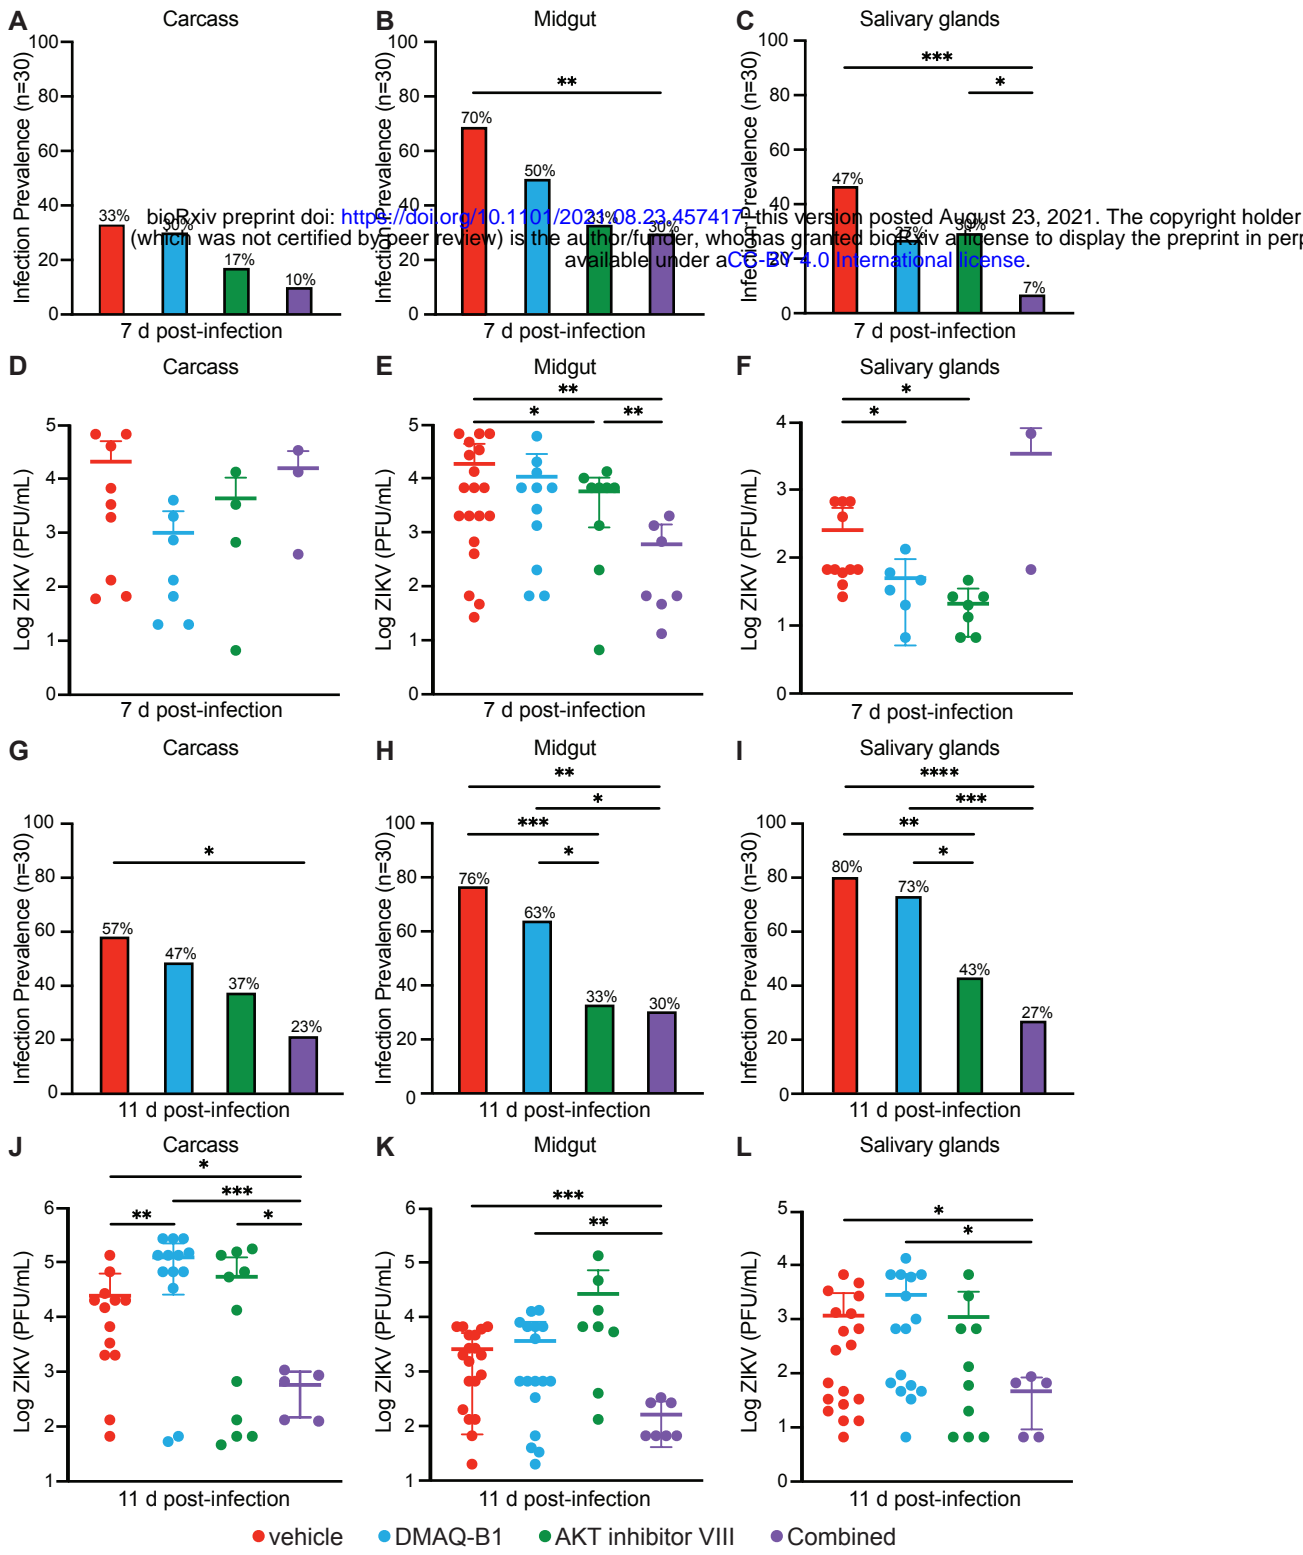

Figure 3

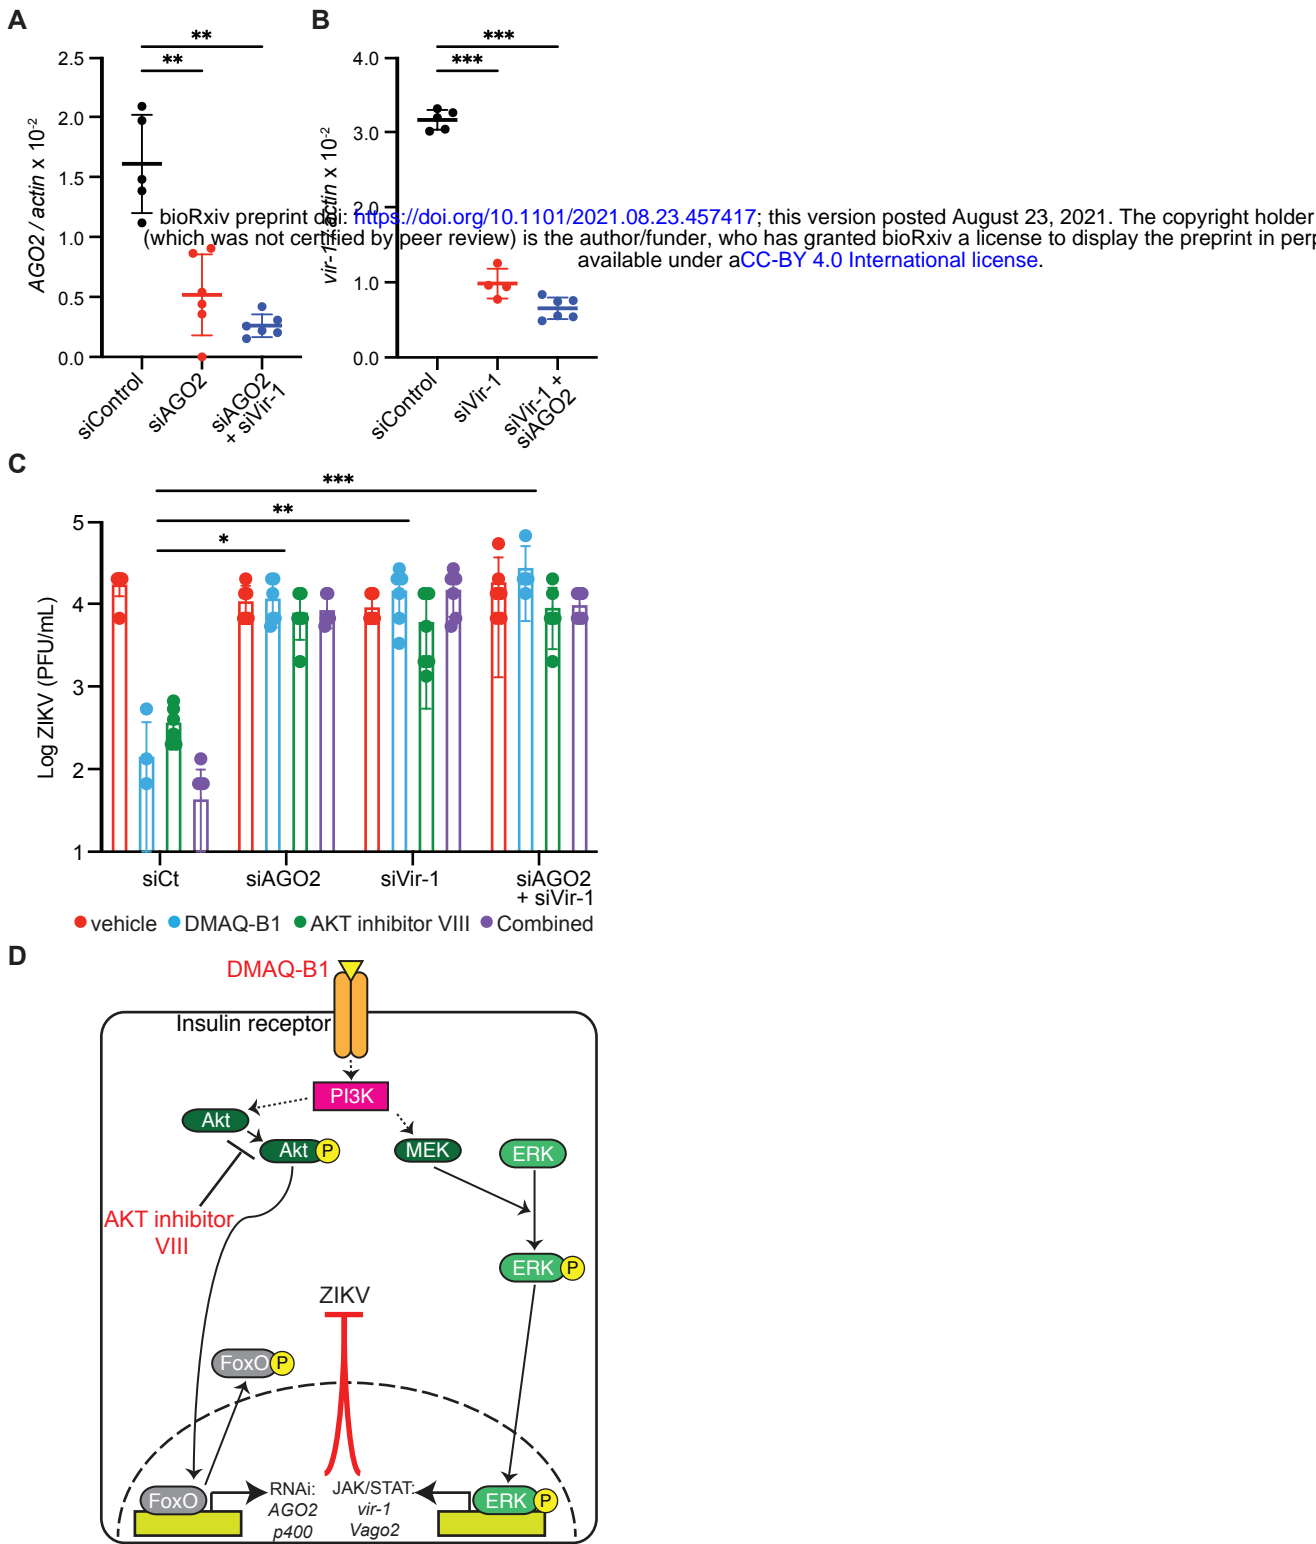

Figure 4



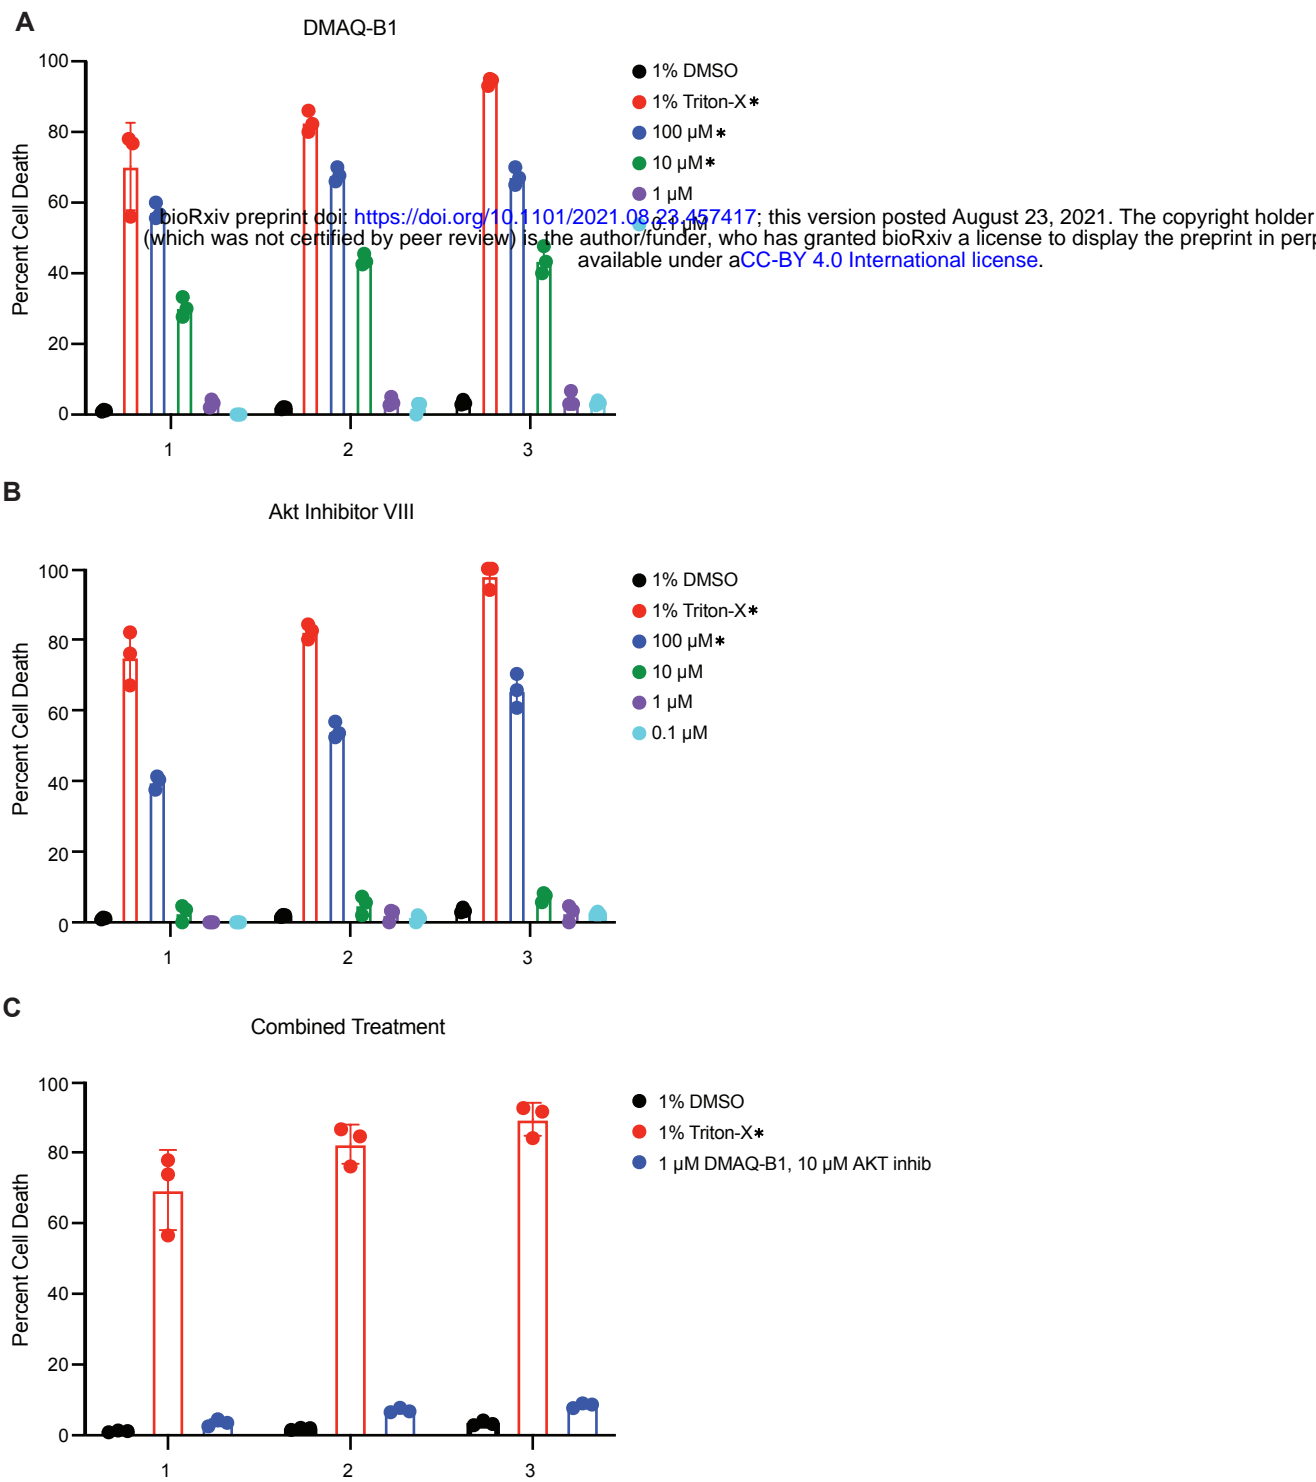

Figure S1

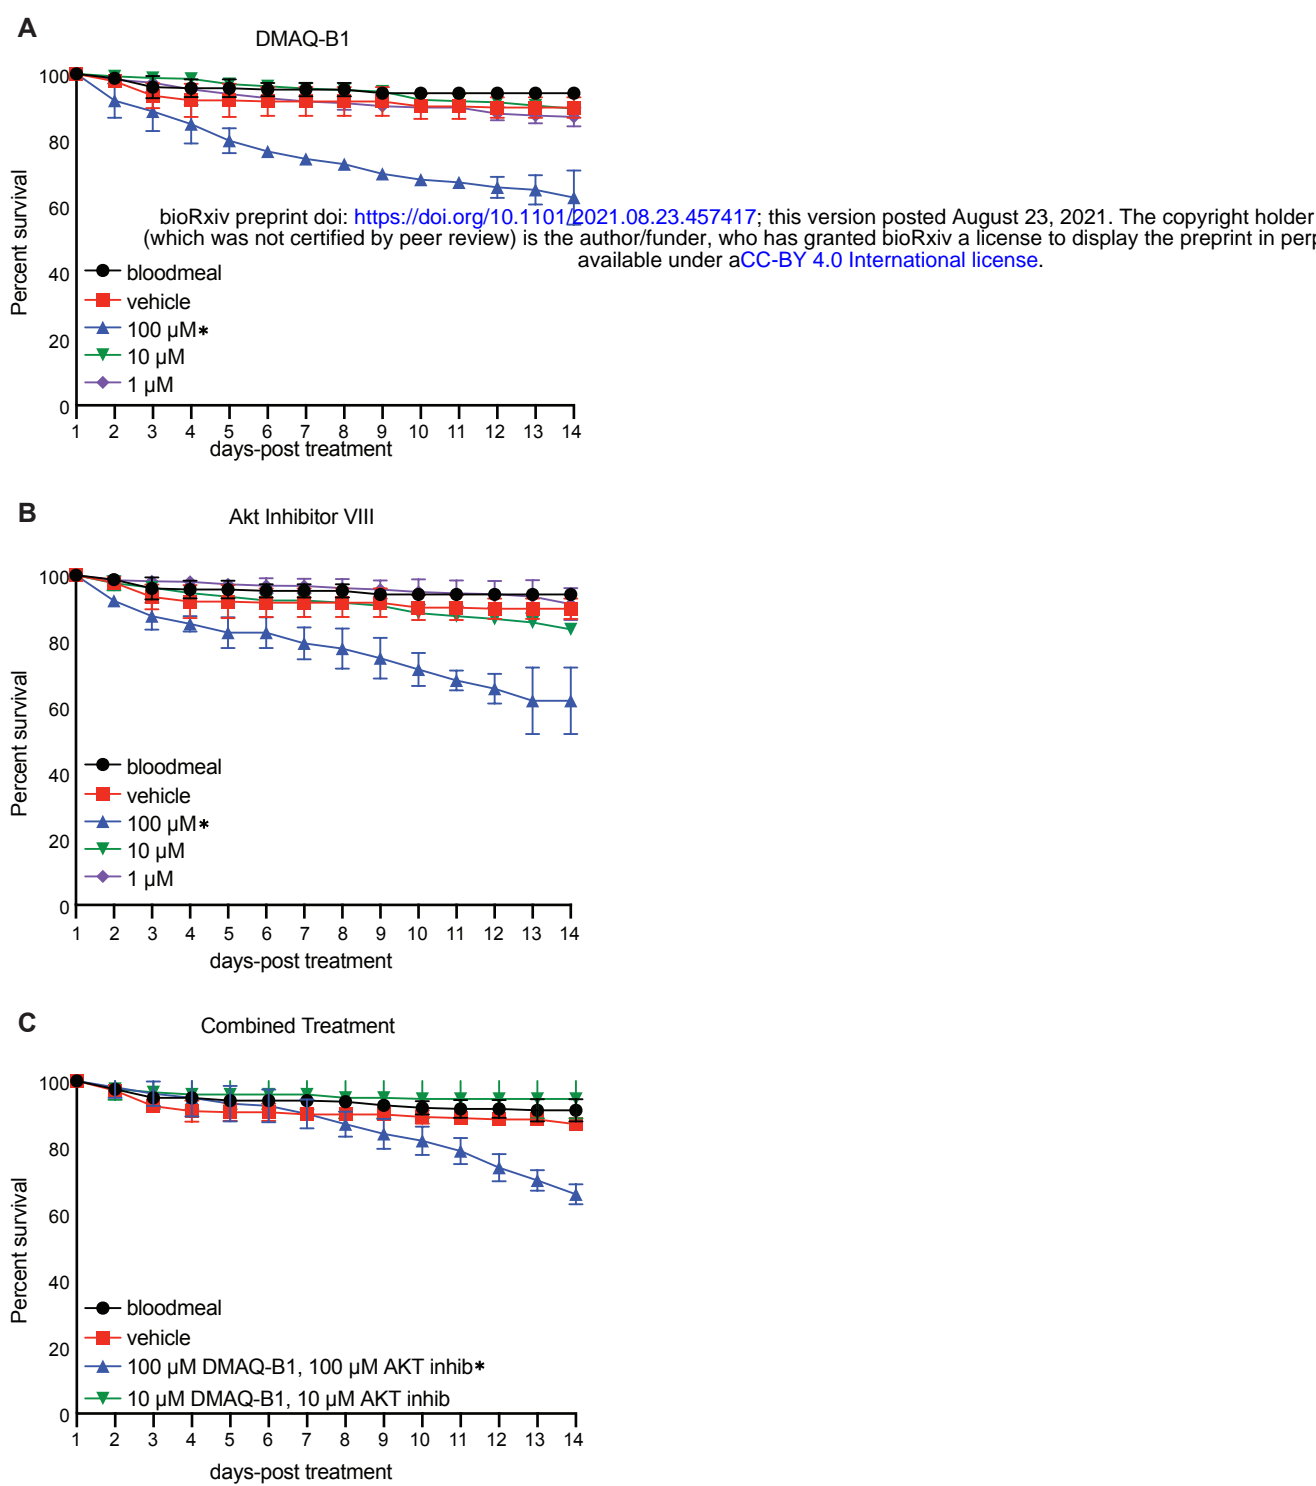

Figure S2

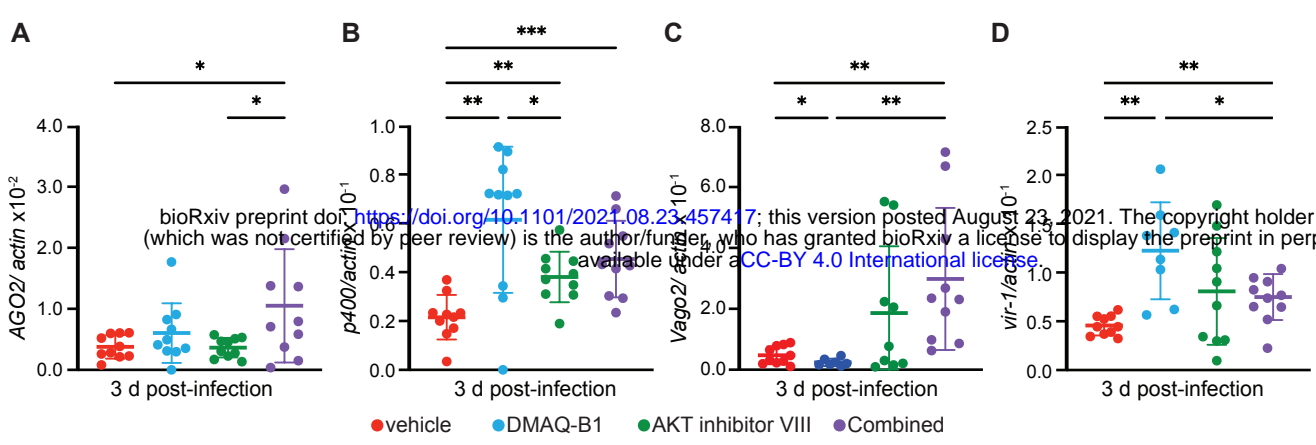

Figure S3

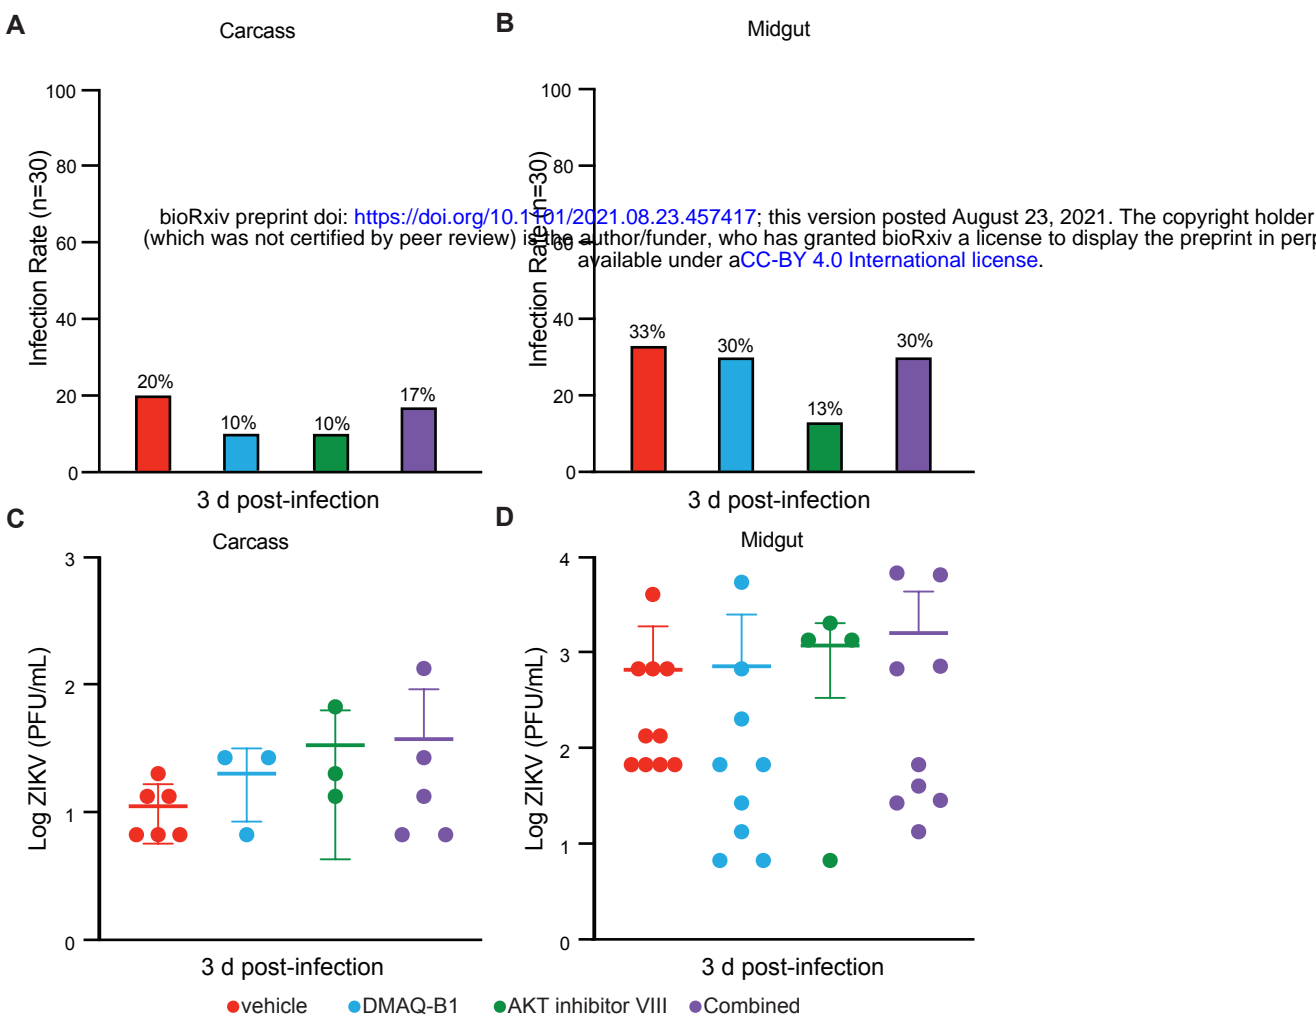

Figure S4

## KEY RESOURCES TABLE

| REAGENT or RESOURCE                                                                    | SOURCE                                            | IDENTIFIER                                                      |
|----------------------------------------------------------------------------------------|---------------------------------------------------|-----------------------------------------------------------------|
| <b>Antibodies</b>                                                                      |                                                   |                                                                 |
| Rabbit monoclonal anti-phospho-Akt (Ser473)                                            | Cell Signaling                                    | Cat#4060<br>RRID:AB_2315049                                     |
| Rabbit polyclonal anti-phospho-FOXO1 (Thr24)/FOXO3a (Thr32)                            | Cell Signaling                                    | Cat#9464<br>RRID:AB_329842                                      |
| Mouse monoclonal anti-MAP Kinase, Activated (Diphosphorylated ERK1/2) (Erk1/2) (137F5) | Sigma Aldrich                                     | Cat#M8159<br>RRID:AB_477245                                     |
| Rabbit polyclonal anti-actin                                                           | Sigma                                             | Cat#A2066<br>RRID:AB_476693                                     |
| Anti-rabbit IgG (H+L) HRP conjugate                                                    | Promega                                           | Cat#4011<br>RRID:AB_430833                                      |
| Anti-mouse IgG (H+L) HRP conjugate                                                     | Promega                                           | Cat#4021<br>RRID:AB_430834                                      |
| <b>Virus Strains</b>                                                                   |                                                   |                                                                 |
| Zika virus                                                                             | Laboratory of Greg Ebel/ CDC                      | PRVABC59 strain                                                 |
| <b>Biological Samples</b>                                                              |                                                   |                                                                 |
| Sheep Blood                                                                            | Colorado Serum Company                            | Cat#31123                                                       |
| Hog sausage casing                                                                     | Beaver's Market (Local market)                    | N/A                                                             |
| <i>Aedes aegypti</i> eggs (Strain Poza Rica)                                           | Vera-Maloof et al., <i>PLOS Neg Trop Dis</i> 2015 | Laboratory of Ken Olson                                         |
| <b>Chemicals, Peptides, and Recombinant Proteins</b>                                   |                                                   |                                                                 |
| Demethylasterriquinone B1 (DMAQ-B1)                                                    | R&D Systems                                       | Cat#1819/5                                                      |
| AKT inhibitor VIII                                                                     | Sigma Aldrich                                     | CaT#124018                                                      |
| <b>Experimental Models: Cell Lines</b>                                                 |                                                   |                                                                 |
| <i>Cercopithecus aethiops</i> : Cell line Vero                                         | ATCC                                              | CCL-81                                                          |
| <i>Aedes aegypti</i> : Cell line Aag2wMel.tet                                          | Terradas et al., <i>Sci Rep</i> 2017              | Laboratory of Scott O'Neill                                     |
| <b>Oligonucleotides</b>                                                                |                                                   |                                                                 |
| AeActin qRT-PCR:<br>Forward: GAACACCCAGTCCTGCTGACA<br>Reverse: TGCATCATCTTCTCACGGTTAG  | Integrated DNA Technologies                       | Diop et al., <i>Viruses</i> 2019                                |
| AeAGO2 qRT-PCR:<br>Forward: CAACTTCGGTATCCTTCT<br>Reverse: TTCCCGTCTTGTAATCTCC         | Integrated DNA Technologies                       | Bernhardt et al., <i>PLOS One</i> 2012                          |
| AeVir-1 qRT-PCR:<br>Forward: GCCAAAGTCCGGTATTCTTC<br>Reverse: TTCACGAGATCGTCAAGGTAA    | Integrated DNA Technologies                       | Diop et al., <i>Viruses</i> 2019                                |
| AeP400 qRT-PCR:<br>Forward: GGAACCAGTCCAGCCATGAA<br>Reverse: CGATCGCTCCTGCATTTGTG      | Integrated DNA Technologies                       | McFarlane et al., <i>mSphere</i> 2020                           |
| AeVago2 qRT-PCR:<br>Forward: CGACCCGGAATGTGTGAAGA<br>Reverse: GCAGCATTGTGGGTAGTCCT     | Integrated DNA Technologies                       | Asad, Parry, and Asgari, <i>Insect Biochem and Mol Bio</i> 2018 |

|                                                                                         |                             |                                                    |
|-----------------------------------------------------------------------------------------|-----------------------------|----------------------------------------------------|
| AeAGO2 siRNA qRT-PCR:<br>Forward: ACAACAGCAACAATCCCAGA<br>Reverse: GTGGACGTTGATCTTGTTGG | Integrated DNA Technologies | Terradas, Joubert, and McGraw, <i>Sci Rep</i> 2017 |
| AeVir-1 qRT-PCR:<br>Forward: GCCAAAGTCCGGTATTCTTC<br>Reverse: TTCACGAGATCGTCAAGGTAA     | Integrated DNA Technologies | Terradas, Joubert, and McGraw, <i>Sci Rep</i> 2017 |
| AeAGO2 siRNA:<br>Sense: CCTAAAGCAGGGTGTCCAAAdTdT<br>Antisense: TTGGACACCCTGCTTTAGGdTdT  | Sigma                       | Terradas, Joubert, and McGraw, <i>Sci Rep</i> 2017 |
| AeVir-1 siRNA:<br>Sense: CGGAAGATACCCAGACCAAdTdT<br>Antisense: TTGGTCTGGGTATCTTCCGdTdT  | Sigma                       | Terradas, Joubert, and McGraw, <i>Sci Rep</i> 2017 |
| AeScramble siRNA:<br>Sense: GATTAGACGAATACCACTA<br>Antisense: CTAATCTGCTTATGGTGAT       | Sigma                       | Clemons et al., <i>PLOS One</i> 2011               |
| <b>Software and Algorithms</b>                                                          |                             |                                                    |
| Prism                                                                                   | GraphPad                    | Version 9                                          |
| Leica Application Suite X (LAS X)                                                       | Leica Microsystems          | Version 3                                          |
| Image Lab                                                                               | Bio-Rad                     | Version 6.1                                        |
| Adobe Illustrator 2021                                                                  | Adobe                       | Version 25.2.3                                     |

**Table S1. Primers for qRT-PCR and siRNA synthesis**

| Gene          | Forward qRT-PCR primer | Reverse qRT-PCR primer | Citation                                                        |
|---------------|------------------------|------------------------|-----------------------------------------------------------------|
| AeActin       | GAACACCCAGTCCTGCTGACA  | TGCGTCATCTTCTCACGGTTAG | Diop et al., <i>Viruses</i> 2019                                |
| AeAGO2        | CAACTTCGGTATCCTTCT     | TTCCCGTCTTGTAAATCTCC   | Bernhardt et al., <i>PLOS One</i> 2012                          |
| AeVir-1       | GCCAAAGTCCGGTATTCTTC   | TTCACGAGATCGTCAAGGTAA  | Diop et al., <i>Viruses</i> 2019                                |
| AeP400        | GGAACCAGTCCAGCCATGAA   | CGATCGCTCCTGCATTTGTG   | McFarlane et al., <i>mSphere</i> 2020                           |
| AeVago2       | CGACCCGGAATGTGTGAAGA   | GCAGCATTGTGGGTAGTCCT   | Asad, Parry, and Asgari, <i>Insect Biochem and Mol Bio</i> 2018 |
| AeAGO2 siRNA  | ACAACAGCAACAATCCAGA    | GTGGACGTTGATCTTGTTGG   | Terradas, Joubert, and McGraw, <i>Sci Rep</i> 2017              |
| AeVir-1 siRNA | GCCAAAGTCCGGTATTCTTC   | TTCACGAGATCGTCAAGGTAA  | Terradas, Joubert, and McGraw, <i>Sci Rep</i> 2017              |

| Gene       | Sense/<br>Antisense | Reverse dsRNA primer    | Start | Target Sequence     | Citation                                           |
|------------|---------------------|-------------------------|-------|---------------------|----------------------------------------------------|
| AeAGO2     | sense               | CCUAAAGCAGGGUGUCCAAdTdT | 1836  | CCTAAAGCAGGGTGTCCAA | Terradas, Joubert, and McGraw, <i>Sci Rep</i> 2017 |
|            | antisense           | UUGGACACCCUGCUUUAGGdTdT | 1836  | TTGGACACCCTGCTTTAGG | Terradas, Joubert, and McGraw, <i>Sci Rep</i> 2017 |
| AeVir-1    | sense               | CGGAAGAUACCCAGACCAAdTdT | 404   | CGGAAGATACCCAGACCAA | Terradas, Joubert, and McGraw, <i>Sci Rep</i> 2017 |
|            | antisense           | UUGGUCUGGGUAUCUCCGdTdT  | 404   | TTGGTCTGGGTATCTTCCG | Terradas, Joubert, and McGraw, <i>Sci Rep</i> 2017 |
| AeScramble | sense               | GATTAGACGAATACCACTA     |       |                     | Clemons et al., <i>PLOS One</i> 2011               |
|            | antisense           | CTAATCTGCTTATGGTGAT     |       |                     | Clemons et al., <i>PLOS One</i> 2011               |
